# Supplementary material for: Barriers and facilitators of loaded self-managed exercises and physical activity in people with patellofemoral pain: understanding the feasibility of delivering a multicentred randomised controlled trial, a UK qualitative study
Source: PubMed Central journal article supplement (PMC6561411; doi:10.1136/bmjopen-2018-023805), 2019-06-03
Supplement: bmjopen-2018-023805.draft_revisions.pdf [file bmjopen-2018-023805.draft_revisions.pdf]

# BMJ Open

BMJ Open is committed to open peer review. As part of this commitment we make the peer review history of every article we publish publicly available.

When an article is published we post the peer reviewers' comments and the authors' responses online. We also post the versions of the paper that were used during peer review. These are the versions that the peer review comments apply to.

The versions of the paper that follow are the versions that were submitted during the peer review process. They are not the versions of record or the final published versions. They should not be cited or distributed as the published version of this manuscript.

BMJ Open is an open access journal and the full, final, typeset and author-corrected version of record of the manuscript is available on our site with no access controls, subscription charges or pay-per-view fees (<http://bmjopen.bmj.com>).

If you have any questions on BMJ Open's open peer review process please email [info.bmjopen@bmj.com](mailto:info.bmjopen@bmj.com)

# BMJ Open

## Barriers and facilitators of loaded self-managed exercises and physical activity in people with patellofemoral pain: understanding the feasibility of delivering a multi-centred randomised controlled trial – A UK qualitative study

|                               |                                                                                                                                                                                                                                                                                                                                                                                                                                                                                                                                                                                                                                                                                                                                                                                                                                                                                                                                                                                                                                                          |
|-------------------------------|----------------------------------------------------------------------------------------------------------------------------------------------------------------------------------------------------------------------------------------------------------------------------------------------------------------------------------------------------------------------------------------------------------------------------------------------------------------------------------------------------------------------------------------------------------------------------------------------------------------------------------------------------------------------------------------------------------------------------------------------------------------------------------------------------------------------------------------------------------------------------------------------------------------------------------------------------------------------------------------------------------------------------------------------------------|
| Journal:                      | <i>BMJ Open</i>                                                                                                                                                                                                                                                                                                                                                                                                                                                                                                                                                                                                                                                                                                                                                                                                                                                                                                                                                                                                                                          |
| Manuscript ID                 | bmjopen-2018-023805                                                                                                                                                                                                                                                                                                                                                                                                                                                                                                                                                                                                                                                                                                                                                                                                                                                                                                                                                                                                                                      |
| Article Type:                 | Research                                                                                                                                                                                                                                                                                                                                                                                                                                                                                                                                                                                                                                                                                                                                                                                                                                                                                                                                                                                                                                                 |
| Date Submitted by the Author: | 25-Apr-2018                                                                                                                                                                                                                                                                                                                                                                                                                                                                                                                                                                                                                                                                                                                                                                                                                                                                                                                                                                                                                                              |
| Complete List of Authors:     | Smith, Benjamin; Derby Teaching Hospitals NHS Foundation Trust, Physiotherapy Outpatients; University of Nottingham, Division of Rehabilitation and Ageing, School of Medicine<br>Moffatt, Fiona; University of Nottingham<br>Hendrick, Paul ; University of Nottingham, Division of Physiotherapy and Rehabilitation Sciences, School of Health Sciences; University of Nottingham,<br>Bateman, Marcus; Derby Teaching Hospitals NHS Foundation Trust, Physiotherapy Outpatients<br>Rathleff, Michael ; Department of Clinical Medicine at Aalborg University, Research Unit for General Practice in Aalborg; Aalborg University Hospital, Department of Occupational Therapy and Physiotherapy, Department of Clinical Medicine<br>Selfe, James; Manchester Metropolitan University, Department of Health Professions<br>Smith, Toby O.; University of Oxford , Nuffield Department of Orthopaedics, Rheumatology and Musculoskeletal Sciences<br>Logan, Phillipa; University of Nottingham, Division of Rehabilitation and Ageing, School of Medicine |
| Keywords:                     | patellofemoral pain, PFP, QUALITATIVE RESEARCH, REHABILITATION MEDICINE                                                                                                                                                                                                                                                                                                                                                                                                                                                                                                                                                                                                                                                                                                                                                                                                                                                                                                                                                                                  |
|                               |                                                                                                                                                                                                                                                                                                                                                                                                                                                                                                                                                                                                                                                                                                                                                                                                                                                                                                                                                                                                                                                          |

SCHOLARONE™  
Manuscripts

1  
2  
3  
4  
5  
6  
7  
8  
9

## **Barriers and facilitators of loaded self-managed exercises and physical activity in people with patellofemoral pain: understanding the feasibility of delivering a multi-centred randomised controlled trail – A UK qualitative study**

10 Benjamin E Smith<sup>1,2,\*</sup>, Fiona Moffatt<sup>3</sup>, Paul Hendrick<sup>3</sup>, Marcus Bateman<sup>1</sup>, James Selfe<sup>4</sup>, Michael Skovdal Rathleff<sup>5,6</sup>, Toby O Smith<sup>7</sup>, Pip Logan<sup>2</sup>

11  
12  
13  
14  
15  
16  
17  
18  
19

<sup>1</sup>Derby Teaching Hospitals NHS Foundation Trust, Physiotherapy Department (Level 3), London Road Community Hospital, Derby DE1 2QY, UK

20  
21  
22

<sup>2</sup>Division of Rehabilitation and Ageing, School of Medicine, University of Nottingham, Nottingham, UK

23  
24  
25

<sup>3</sup>Division of Physiotherapy and Rehabilitation Sciences, School of Health Sciences, University of Nottingham, Nottingham University Hospitals (City Campus), Nottingham, UK.

26  
27  
28

<sup>4</sup>Department of Health Professions, Manchester Metropolitan University, Manchester, UK

29  
30  
31

<sup>5</sup>Research Unit for General Practice in Aalborg, Department of Clinical Medicine at Aalborg University, Aalborg, Denmark

32  
33  
34

<sup>6</sup>Department of Occupational Therapy and Physiotherapy, Department of Clinical Medicine, Aalborg University Hospital, Denmark

35  
36  
37

<sup>7</sup>Nuffield Department of Orthopaedics, Rheumatology and Musculoskeletal Sciences, University of Oxford, UK

38  
39  
40  
41  
42  
43  
44  
45  
46  
47  
48  
49  
50  
51  
52  
53  
54  
55  
56  
57  
58  
59  
60

\*Corresponding author. Tel: 01332 254631 Email: [benjamin.smith3@nhs.net](mailto:benjamin.smith3@nhs.net)

## Abstract

### Objectives:

There is an emergent body of evidence supporting exercise therapy and physical activity in the management of musculoskeletal pain. The purpose of this study was to explore potential barriers and facilitators with patients and physiotherapists with patellofemoral pain involved in a feasibility randomised controlled trial (RCT) study. The trial investigated a loaded self-managed exercise intervention, which included education and advice on physical activity versus usual physiotherapy as the control.

### Design:

Qualitative study, embedded within a mixed-methods design, using semi-structured interviews.

### Setting:

A UK National Health Service physiotherapy clinic in a large teaching hospital.

### Participants:

Purposively sampled 20 participants within a feasibility RCT study; 10 patients with a diagnosis of patellofemoral pain, aged between 18 and 40, and 10 physiotherapists delivering the interventions.

### Results:

In respect to barriers and facilitators, the five overlapping themes that emerged from the data were: (1) locus of control; (2) belief and attitude to pain; (3) treatment expectations and preference; (4) participants' engagement with the loaded self-managed exercises; and (5) physiotherapists' clinical development. Locus of control was one overarching theme that was evident throughout.

Contrary to popular concerns relating to painful exercises, all participants in the intervention group reported positive engagement. Both physiotherapists and patients, in the intervention group, viewed the single exercise approach in a positive manner. Participants within the intervention group described narratives demonstrating self-efficacy, with greater internal locus of control compared to those who received usual physiotherapy, particularly in relation to physical activity.

### Conclusions:

Implementation, delivery and evaluation of the intervention in clinical settings may be challenging, but feasible with the appropriate training for physiotherapists.

Participants' improvements in pain and function may have been mediated, in some part, by greater self-efficacy and locus of control.

### Trial registration:

ISRCTN 35272486

## Article Summary

### Strengths and limitations of this study:

- This paper identified, through interviews, key barriers and facilitators to implementation of a loaded self-managed exercise programme, with education and advice on physical activity.
- Two authors independently coded all transcripts, and a clear, transparent and reproducible methodological approach was used in the analysis.
- The main limitations of this study were the difficulty in interviewing patients lost to follow-up (from both groups) and finding patients classed as 'non-responders' in the loaded self-managed group.
- The study population comprised of a single clinical setting, where the researcher was also a clinician.

For peer review only

## Introduction

Patellofemoral pain (PFP) is one of the most common forms of knee pain in adults under the age of 40 years, with an estimated prevalence of 23% in the general population.<sup>[1]</sup> Many individuals with PFP develop associated pain-related fear, such as fear-avoidance and catastrophising thoughts in relation to their knee pain.<sup>[2][3,4]</sup>

This research was undertaken within a framework of mixed-methods, embedded within a feasibility study comparing a loaded self-managed exercise protocol with usual physiotherapy for people with PFP.<sup>[5]</sup> The loaded self-managed exercise programme included an education and advice component around physical activity. To avoid cross-contamination between the two groups the intervention group was treated by different qualified physiotherapists, who received the intervention training package, to the usual physiotherapy group.

Protocols that use loaded exercises are typically painful to perform,<sup>[5]</sup> though increased pain levels during exercise is often cited as a strong predictor of poor adherence.<sup>[6]</sup> Secondly, pain education and increasing physical activity require a certain level of self-management and personal responsibility on the part of the patient, also strong predictors of poor exercise adherence.<sup>[6]</sup> And thirdly, a key aspect of the loaded self-managed exercise programme is the single exercise method, which physiotherapists and patients historically viewed with a degree of scepticism, when used in treating shoulder pain.<sup>[7,8]</sup>

Therefore, the aim of this qualitative investigation was to explore potential barriers and facilitators to implementation of the intervention with participants with patellofemoral pain involved in a feasibility randomised controlled trial (RCT).<sup>[5]</sup> To fully explore the aims of this study patients and physiotherapists receiving and delivering both the intervention and usual physiotherapy were interviewed.

## Method

A qualitative study was conducted embedded within a mixed-methods feasibility study. The framework approach was the most appropriate method for inquiry, as the objectives of the investigation were set *a priori*.<sup>[9]</sup>

This study has been reported in line with the CONSolidated criteria for REporting Qualitative research (COREQ) checklist.<sup>[10]</sup>

The authors took an epistemological position described as “contextualist” by Braun and Clarke.<sup>[11]</sup> Through this, the beliefs and perceptions of a person generates experience at an individual level, with any meanings attached, whilst considering the wider context within a sociocultural perspective. Sitting central on the spectrum of realism and constructivism, this position has been discussed in detail in relation to this mixed-methods study.<sup>[2]</sup>

## Participants

A purposive sample of ten patients with PFP were recruited from the 60 patients who were recruited to a feasibility study, this included patients in the intervention group and those receiving usual physiotherapy. Based on similar studies, we anticipated this sample size would be sufficient to reach data saturation.<sup>[7,8]</sup> Patients were selected based on representation of a spectrum of population in terms of: intervention delivered (both the intervention, and usual physiotherapy), age, gender, return of outcome forms, and clinical outcome, as determined by a global rating of change at follow-up measured on a 7-point Likert scale ranging from “completely recovered” to “worse than ever”.<sup>[5]</sup> Clinical responders were defined as “completely recovered” or “strongly recovered”.<sup>[5]</sup> Attempts were made to interview those lost to follow up and non-responders in both groups.

Initial recruitment to the feasibility study included gaining consent for taking part in future qualitative investigations. Participants were initially followed up by a telephone call. If they agreed, a convenient time was arranged to complete an interview. Participants were given the opportunity to discuss any concerns before the interviews started.

Ten physiotherapists were purposively sampled, this included those delivering the intervention and those delivering usual physiotherapy. Based on similar studies, we anticipated this sample size would be sufficient to reach data saturation.<sup>[7,8]</sup> Again, physiotherapists were selected based on characteristic to represent a spectrum population in terms of: intervention delivered, age, sex and length of time qualified. The physiotherapists initially agreed to take part in the research when briefed during the study intervention training sessions. They were subsequently approached about the qualitative component of the study via team meetings. Participants were given the opportunity to read the participant information sheet and to ask any questions before the consent form was signed.

## Recruitment

All participants were interviewed at a convenient time in the hospital-based physiotherapy department. The researcher (BES) introduced himself as a physiotherapist working in that department, and as a researcher conducting a PhD. The researcher explained the aims of the study. Verbal consent was taken to start recording.

## Data Collection

Semi-structured interviews were designed by the researchers (BES and FM) using topic guidelines with prompts to explore barriers and facilitators to taking part in a loaded self-managed exercise intervention. Patients from both treatment groups were asked about response to treatment, belief and attitude to pain, belief and attitude to physical activity, treatment expectations and protocol parameters. Only those in the intervention group were asked about their engagement with the loaded self-managed intervention. All physiotherapists were asked about their usual practice, personal development, belief and attitude to pain, belief and attitude to physical activity and protocol parameters. Only those delivering the intervention were asked about their engagement with the loaded self-managed intervention, including the training package. The interviews ranged from five to 21 minutes (mean time: 11 minutes) in duration.

The interview guide was not piloted, however the researcher maintained a reflective journal, noting down initial thoughts and ideas after each interview.<sup>[12]</sup> This identified that the first two interviews raised matters relating to responsibility and locus of control around return to physical activity. This was incorporated into subsequent interview schedules for both patients and physiotherapists.

## Data Analysis

All audio files were collected and transcribed verbatim.

The data were analysed using a thematic Framework Method,<sup>[9]</sup> which was the most appropriate method for inquiry, as the objectives of the investigation were set *a priori*.<sup>[9]</sup> Furthermore, data analysis can be conducted systematically, allowing the data to be explored in depth while simultaneously maintaining an effective and transparent audit trail.<sup>[9]</sup> During transcription, initial thoughts and ideas were noted in the reflective journal. Audio files were listened to several times to check for accuracy, and transcriptions were read and re-read a number of times; this data familiarisation further informed the development of a thematic framework. Following familiarisation, both authors agreed on the initial thematic framework. Data coding then identified and coded pertinent features of the data giving equal priority over the whole dataset. These steps were independently conducted by two researchers (BES & FM) who met to compare codes. This formed a working analytical framework upon which the data were examined. The transcripts were then indexed using the categories and codes on the working framework. During this process, the data were organised according to the defined thematic framework. Charting was then used to summarise and display the data by category and theme for each transcript.<sup>[9,13]</sup> Indexing was initiated by one researcher (BES), prior to charting, and subsequently developed and verified by a second researcher (FM).

Data were organised and analysed using QSR International's NVivo 11. After 10 interviews per group, it was determined by the researchers that data saturation had occurred as no new thoughts or concepts were generated in the later interviews.

## Patient and Public Involvement

This research project has been driven by the views of people suffering from PFP. Patients were consulted for their views, including patient members of the Steering Group Committee. Thoughts and preferences to current programmes of therapy and treatment were requested, and these views have been incorporated into the planning, design, application and dissemination of this study.



## Results

The 10 patients included three men and seven women, aged between 26 to 37 years (mean: 30.6 years), with a diagnosis of PFP for a mean duration of 25 months (range: 3 months to 10 years). The 10 physiotherapists included two men and eight women, aged between 24 to 58 years (mean: age 39.4 years), with a mean of 16 years qualified (range: 3 years to 37 years). Full patient and physiotherapist characteristics are presented in Table 1 and Table 2 respectively.

| Participant Number | Gender | Duration of symptoms (m) | Intervention Received | Clinical Responder |
|--------------------|--------|--------------------------|-----------------------|--------------------|
| P1                 | M      | 120                      | Intervention          | Responder          |
| P2                 | M      | 12                       | Usual Physiotherapy   | Non-responder      |
| P3                 | F      | 5                        | Usual Physiotherapy   | Non-responder      |
| P4                 | F      | 18                       | Usual Physiotherapy   | Responder          |
| P5                 | F      | 3                        | Intervention          | Responder          |
| P6                 | F      | 18                       | Usual Physiotherapy   | Non-responder      |
| P7                 | F      | 12                       | Usual Physiotherapy   | Responder          |
| P8                 | F      | 36                       | Intervention          | Non-responder      |
| P9                 | M      | 9                        | Intervention          | Responder          |
| P10                | F      | 12                       | Intervention          | Responder          |

| Therapist Number | Sex | Length Qualified (y) | Intervention Delivered |
|------------------|-----|----------------------|------------------------|
| T1               | F   | 17                   | Usual Physiotherapy    |
| T2               | F   | 5                    | Intervention           |
| T3               | M   | 7                    | Intervention           |
| T4               | F   | 22                   | Intervention           |
| T5               | F   | 36                   | Usual Physiotherapy    |
| T6               | F   | 30                   | Usual Physiotherapy    |
| T7               | F   | 37                   | Intervention           |
| T8               | M   | 3                    | Intervention           |
| T9               | F   | 3                    | Usual Physiotherapy    |
| T10              | F   | 3                    | Usual Physiotherapy    |

In respect to barriers and facilitators, the five major overlapping themes that emerged from the data were: (1) locus of control; (2) belief and attitude to pain; (3) treatment expectations and preference; (4) participants' engagement with the loaded self-managed exercises; and (5) physiotherapists' clinical development. Locus of control was one overarching theme that was evident throughout. The findings are presented in relation to existing literature.

### Theme 1: locus of control

Locus of control is a psychological construct about the degree people believe they have control over their actions and outcomes.<sup>[14]</sup> A key feature of the intervention being evaluated in the RCT, is the self-dosing of exercise, based on the symptomatic response, and the self-managed approach to physical activity. This could be conceptualised as internalising locus of control with the patient, and is thought to predict treatment compliance, acting as a barrier or facilitator to implementation.<sup>[6]</sup> Patients within the intervention group described narratives that could be conceptualised as greater internal locus of control, compared with patients in the usual physiotherapy group.

*R: And how did you feel about being in charge of that [the exercise]?*

1  
2  
3 *P8: Yeah. I think it was empowering in a way. [Loaded Self-Managed]*  
4

5  
6 Early interviews raised matters relating to whose authority it was to give the 'permission' to return to,  
7 or increase, physical activity; including when and how this should be done. Again, clear differences  
8 between usual physiotherapy and the intervention could be seen, particularly in relation to  
9 physiotherapists' management approach to physical activity.  
10

11 *"Ultimately up to the patient really. They should feel in charge of what they do. They need to*  
12 *have control of the situation. If they're just waiting for somebody else to dictate that, then they*  
13 *haven't got very good control. But they might need some encouragement or reassurance that*  
14 *it's okay to actually, if you want to get back to these activities you can. You don't need to ask*  
15 *me permission really."* [T2 – Loaded Self-Managed].  
16  
17

18  
19  
20 *I would usually kind of bat it back to them and say, "Well, what do you think you can do?" And*  
21 *using the same principles as with the exercises, if you're getting some discomfort at the time,*  
22 *it doesn't mean to say you then stop. And just see how it is afterwards, and then modify how*  
23 *much you're doing in response to how much pain you're experiencing afterwards.* [T4 – Loaded  
24 *Self-Managed].*  
25  
26

27  
28 Contrasting the push for an internal locus of control with the intervention was a narrative discussed  
29 by some patients receiving usual physiotherapy. For example, Participant 4 had indicated she was  
30 'strongly recovered', had minimal pain and had returned to almost all of her usual activity. However,  
31 she had not returned to the gym yet, and had booked a follow-up appointment with the treating  
32 physiotherapist for after the interviews where she hoped to receive the 'go-ahead' to return.  
33

34  
35 And this patient narrative was reinforced by the treating physiotherapists' understanding of their role:  
36

37 *"I'd assess them functionally. So you kind of break down that hobby or that activity into*  
38 *sections. So if it's a sport, look at part of it... and if you can't do two or three of them, it's not*  
39 *just your knee that's letting you down. Generally, you're not quite ready for that."* [T10 – Usual  
40 *Physiotherapy].*  
41  
42

43  
44 A few of the physiotherapists within the usual physiotherapy group viewed their role more of a  
45 partnership with the patient, where decisions about return to activity were agreed mutually.  
46

47 *"Well, it'd be a mutual thing. A lot of them weren't sporty, but they would ask and we discussed*  
48 *the suitability."* [T5 – Usual Physiotherapy].  
49  
50

51  
52 Locus of control is interrelated to the psychological construct of self-efficacy, where it relates to the  
53 power of thinking in achieving treatment outcomes.<sup>[15]</sup> The loaded self-managed exercise programme  
54 is designed around optimisation of self-management and self-efficacy. For example, the progressive  
55 hierarchy of the exercise demonstrates and provides evidence to the patient that they are  
56 systematically approaching their clinical and personal goals.<sup>[16]</sup> Some patients within the intervention  
57 group expressed views that could be contextualised as self-efficacious in line with this hierarchy.  
58  
59  
60

1  
2  
3  
4  
5  
6  
7  
8  
9  
10  
11  
12  
13  
14  
15  
16  
17  
18  
19  
20  
21  
22  
23  
24  
25  
26  
27  
28  
29  
30  
31  
32  
33  
34  
35  
36  
37  
38  
39  
40  
41  
42  
43  
44  
45  
46  
47  
48  
49  
50  
51  
52  
53  
54  
55  
56  
57  
58  
59  
60

*"That sense of just you know how much progress you made. A week ago you did 20, and now you did 30 or 40." [P9 – Loaded Self-Managed].*

---

*"When I hit the target and I then thought, "Oh, I can actually do a few more," and it's comfortable to do, I did do that." P5 – Loaded Self-Managed].*

## Theme 2: treatment expectations and preference

Previous qualitative work has identified unmet treatment expectation as a potential barrier to treatment adherence,<sup>[17,18]</sup> therefore all patients were asked to reflect upon their expectations, with physiotherapists invited to discuss their usual practice. The predominant patient expectation was that they would receive some form of exercise programme from their physiotherapy, and that this would probably involve some level of pain.

A small number of patients discussed an expectation of hands-on passive treatment.

*"I was more expecting sort of a hands-on approach, more like physio massage when I came." [P8 – Loaded Self-Managed].*

Furthermore, in keeping with themes found in other PFP qualitative work,<sup>[2]</sup> several patients established a clear wish for questions to be answered, in relation to causative factors around their pain:

*"For me, I wanted answers on why my knee was painful. Because I think, going back 10 years ago, when I first went to my doctor's, I was told it was ligament damage. And it didn't clear up, and when I went back, it was like, "Well, the waiting list for physio is so long, by the time you get there, you'll be recovered." And then, when I went back again, it was like, "Well, you're too young to have steroid injections." And then, I just always felt I was like, in a sense, sent packing without any answers. And then, I wanted some answers as to why it's hurting so I could understand it." [P10 – Loaded Self-Managed Group]*

Previous qualitative work in patients with PFP found a dominant negative view of physiotherapy,<sup>[2]</sup> with one patient similarly expressing an initial negative view of seeing a physiotherapist.

*"The physio-- I don't know, I was a bit sceptical, to be honest. But yeah, it has given me the result I wanted." [P10 – Loaded Self-Managed].*

All physiotherapists reported that their current practice and preference for treating PFP included an exercise programme. However, in contrast to the majority of UK physiotherapists,<sup>[19]</sup> they all reported an expectation that exercises would be performed with a degree of pain. Though there remained a large amount of heterogeneity in terms of language choice, and what parameters were used, when discussing optimal exercise dosage with patients.

*"But if you think about a VAS or something like that ... probably you wouldn't want your pain to be greater than maybe a 3 or a 4 out of 10." [T1 – Usual Physiotherapy].*

---

1  
2  
3 *“Quite oftentimes I tell people to do reps to kind of fatigue, but not to pain. So people are*  
4 *getting a bit of a niggle, if they can manage it, and they can bring the pain level back down*  
5 *quite quickly afterwards. So if they can do exercises, it aggravates it, but within about a half*  
6 *an hour symptoms have settled, then that's fine.” [T10 – Usual Physiotherapy].*  
7  
8

9 Dissonance between the single exercise approach used in the intervention and treating  
10 physiotherapists' preference was evident. The single exercise approach was not favoured by any of  
11 the physiotherapists interviewed:  
12

13  
14 *“I think possibly the intervention was simpler to do in the fact that it was geared, sort of guided*  
15 *around one exercise. And probably, what I would have done before is perhaps give more*  
16 *exercises and chop and change them maybe a bit more frequently.” [T7 – Loaded Self-*  
17 *Managed].*  
18

19  
20 Additionally, some physiotherapists were very prescriptive with their exercise dosage.  
21

22 *“Initially I might start with them with 15 repetitions and work to three sets, two-minute break*  
23 *in between”. [T9 – Usual Physiotherapy].*  
24

25  
26 Again, in contrast to the majority of UK physiotherapists,<sup>[19]</sup> and similarly to the experimental  
27 intervention, many of the physiotherapists interviewed in this study (from both groups) would try to  
28 encourage the patient to self-dose their exercise:  
29

30 *“I'm a little less strict on sets and reps. I'm more do what you feel you can. If you're happier,*  
31 *push on a little bit more.” [T3 – Loaded Self-Managed].*  
32  
33

34 As identified above, most patients were content with the anticipation that exercises would be painful,  
35 and indeed this matched current clinical practice with the physiotherapists interviewed, despite not  
36 aligning with UK wide current practice.<sup>[19]</sup> Where departmental practice did align itself more with UK  
37 practice, was with regards to the number of exercises prescribed, in clear contrast to the single  
38 exercise approach with the intervention.  
39  
40  
41  
42  
43  
44  
45  
46  
47  
48  
49  
50  
51  
52  
53  
54  
55  
56  
57  
58  
59  
60

### Theme 3: belief and attitude to pain

Interlinked to the all themes, particularly locus of control were patients' and physiotherapists' beliefs and attitudes to pain. There is a growing body of evidence suggesting that health practitioners with a biomedical orientation to pain are more likely to advise patients to limit their physical activity due to pain [20–22]; and consequently may induce fear-avoidant behaviours onto their patients,<sup>[22,23]</sup> acting as a clear barrier to implementation. There were examples in the usual physiotherapy group of biomedical models of diagnosis and management with misconceptions of 'tissue damage':

*"She [the physiotherapist] gave me exercises to do. I've always been keen on the gym. I go to the gym. I was a doing a lot of the stuff she's asking me to do, anyway. Or it's probably more about my technique. I was maybe not doing it as well as I could have done. So I fell back. ...So she referred me for scans on both knees-- well, referred me back to my doctor. My doctor referred me to an orthopaedist. They referred me for a scan on both knees. The MRI scan showed this knee's absolutely fine - which it's not."* [P3 – Usual Physiotherapy].

*R: So if they're not achieving that, would you advise them not to run then?*

*P10: Probably. Yes. I'd probably have a look at them, and if they were really antalgic on their gait, then yeah, tell them not to bother, to work on their weaknesses, and then reassess it a bit later down the line. Because otherwise, they might just end up making their knee 10 times worse because they're running on a weakened, less-controlled knee.* [Usual Physiotherapy]

Of interest is that the physiotherapist delivering the usual physiotherapy, as described in theme 2, did describe treatment preference not fully aligned with the majority of UK physiotherapists,<sup>[19]</sup> and the best practice guidelines,<sup>[24]</sup> in as much as they expressed a belief that pain is acceptable during exercise. Certainly, this did identify some fidelity and contamination concerns with regards to usual physiotherapy:

*"I think it was sometimes a bit hard to stick to usual physio, because we still keep reading. We try to keep up with what's happening... So it's just a bit of reading and then I change 'usual physio', it keeps developing as you work."* [T9 – Usual Physiotherapy].

Yet despite this, there was marked differences in the patients' and physiotherapists' beliefs and attitudes to pain in the intervention group, compared with usual physiotherapy, demonstrating some re-conceptualisation of pain. This suggests the training programme did improve contemporary knowledge of pain science.

*"Yeah, the pain wasn't excruciating or anything. At no point did I think, "I can't keep doing this." It was a fairly normal level, I'd say. It wasn't anything that would make me come back, and say, "I'm worried that I'm doing something wrong," or anything like that. It was fairly normal. I wouldn't say it was too bad."* [P1 – Loaded Self-Managed].

*P7: The physiotherapist said to go ahead and run if it wasn't going to do any damage. Yes, if it's painful, stop.* [Usual Physiotherapy]

1  
2  
3  
4  
5  
6  
7  
8  
9  
10  
11  
12  
*“My own thoughts have been, I think, changed definitely with this intervention. I think exercise is-- I've always said to patients that if it's painful, they can still carry on. But again, like I said, I gave that arbitrary figure. If it goes above this, then maybe taper down... But actually, maybe educating them and telling them, "Pain isn't an indicator of damage. You can push through into it a little bit, but it just has to be something that you're comfortable with." And I think the thing that changed with me saying that to patients was I am not the one that's going to dictate that. You're the one has to go through this.” [T3 – Loaded Self-Managed].*

13  
14  
15  
16  
17  
18  
19  
20  
21  
22  
23  
24  
25  
26  
27  
28  
29  
30  
31  
32  
There was one example of mixed messages from the patient, with regards to acceptable and appropriate levels of pain during exercise and physical activity. This may suggest the heterogeneity in physiotherapy advice, as previously discussed in the second theme with physiotherapists, may have a negative effect with increasing levels of uncertainty. This is in keeping with previous research suggesting an iatrogenic effect with physiotherapy treatment for PFP relating to diagnosis uncertainty and fear-avoidance behaviour.<sup>[2]</sup>

33  
34  
35  
36  
37  
38  
39  
40  
41  
42  
43  
44  
45  
46  
47  
48  
49  
50  
51  
*“He [the physiotherapist] recommend that I didn't run, which is probably the only thing I don't do now. I think it was the impact. Like, my knee with my cartilage. That's why he didn't recommend it at that point.” [P10 – Loaded Self-Managed].*

#### 32 33 34 35 36 37 38 39 40 41 42 43 44 45 46 47 48 49 50 51 52 53 54 55 56 57 58 59 60 **Theme 4: participants' engagement with the loaded self-managed exercises**

Only patients and physiotherapists receiving or delivering the intervention were asked to discuss their thoughts about it. Both patients and physiotherapists reported several different ways in which they interacted and connected with the intervention. Firstly, the intervention laid the foundation of re-conceptualisation of pain-related fear where the physiotherapist spent a period of time educating the patient about pain mechanisms.<sup>[5]</sup> Descriptions of tissue-based pathology models of pain, e.g. patellar mal-tracking, or limb mal-alignment were actively discouraged and challenged by the physiotherapist. The aim was for the patient to gain an evidenced-based understanding of dysfunctional central nociceptive processing as an explanation of chronic and persistent pain and the role and impact of fear.

52  
53  
54  
55  
56  
57  
58  
59  
60  
*“Once you'd explained-- all the key is in the explanation about pain and how pain works and explaining why they're doing it from that. And in fact, sort of the particular girl I'm thinking about, she'd stopped going downstairs because of the pain. When I reviewed her last time, she said, "Well, I haven't been avoiding the stairs." [with no increase in pain levels] So it's good stuff.” [T7 – Loaded Self-Managed].*

Other critical aspects of the intervention discussed by the participants were the self-dosage of the exercise, based upon the symptomatic response, rather than being prescribed by the physiotherapist. These aspects were all discussed positively, with no negative features identified.

*“I think for me I've got results a lot quicker, so because I was kind of going through the pain with all that. And I definitely stuck with the exercise more, because when I first started with*

1  
2  
3 *one exercise I might get a bit bored. But I've definitely stuck to it more."* [P9 – Loaded Self-  
4 *Managed]*  
5

6 The simplicity of a single exercise approach was discussed by all the interviewees, predominantly in a  
7 positive manner.  
8

9  
10 *"So I think it's quite simple, so if I do ever get-- the problem starts to occur again, it's no real*  
11 *problem to just start."* [P1 – Loaded Self-Managed].  
12

13 However, one physiotherapist admitted to being initially sceptical that one exercise would be enough.  
14

15  
16 *"And using that single exercise as that treatment. So in terms of my thoughts before, would*  
17 *that be enough for my patients? And the ones I've seen, have seemingly done well with just*  
18 *one exercise, rather than having four or five different exercises to do."* [T3 – Loaded Self-  
19 *Managed].*  
20

21  
22 The key feature of patients self-dosing their exercise, based on the symptomatic response, is an  
23 understanding of when and how to progress or regress the exercise. Patients recognised the role of  
24 'trial and error' in this process, and the relevance of the pain education prior to the exercise  
25 programme being implemented.  
26

27  
28 *"I do remember, initially, there being kind of a week or two, maybe, where I was kind of finding*  
29 *kind of the right amount [of the exercise to do]."* [P9 – Loaded Self-Managed].  
30

31  
32  
33 *"I think what you tend to do as physios, we very often tend to be quite prescriptive. And*  
34 *patients do ask that. They want to know how many they should do, how many times a day,*  
35 *whereas this is actually giving them much more their own power of making them decide what*  
36 *they're going to do. So actually, hopefully, then they're going to carry on with it in the future."*  
37 *[T7 – Loaded Self-Managed].*  
38

39  
40 Interlinked to self-dosing was the expected pain flare-ups, when patients over dosed their exercise or  
41 physical activity. The physiotherapists' training programme at the start of the feasibility study covered  
42 this topic, with physiotherapists aiming to discuss self-management approaches at preventing and  
43 dealing with flare-ups. Despite this, flare-ups remained common place, and were a cause of concern  
44 for several patients; suggesting this topic needs additional emphasis in any future training programme.  
45

46  
47 *R: Did it worry you when you had those flare-ups?*  
48

49  
50 *P1: Yeah. There were kind of back-of-your-head thoughts, like, "What if this time I have done*  
51 *it a bit too far? If it lasts a bit longer, am I going to have to go back in case I've damaged it a*  
52 *bit?" or anything like that. But most of the time, again, was two days tops. So I did have kind*  
53 *of a little niggling worry, but nothing to kind of cause me to do anything or anything like that.*  
54 *[Loaded Self-Managed]*  
55

56  
57 Both patients and physiotherapists were asked to reflect upon the intervention and their clinical  
58 response. For patients, quantitatively, the global rating of change at follow-up (measured on a 7-point  
59 Likert scale ranging from "completely recovered" to "worse than ever") was used to identify  
60



1  
2  
3 responders and non-responders. The scale was dichotomised so that responders were defined as  
4 'completely recovered' or 'strongly recovered',<sup>[5]</sup> and patients were purposively sampled to ensure  
5 that responders and non-responders were included. However, one patient (Participant 8) who  
6 received the intervention identified quantitatively as a non-responder. However, qualitatively all five  
7 patient participants interviewed from the experimental arm reported improvement and satisfaction  
8 with the loaded self-managed intervention.  
9

10  
11 *"Yeah. I'm playing football again. Yeah. I'm just kind of-- sometimes I can tell I've got a little*  
12 *bit of tension there. But I'm not getting pain. It's not stopping me doing nothing at all. So yeah."*  
13 *[P9 – Loaded Self-Managed].*  
14  
15

16  
17 And this corresponded from the feedback from the treating physiotherapists, with all physiotherapists  
18 reporting favourable outcomes with the intervention.  
19

20  
21 The main emphasis of patients' and physiotherapists' narrative was the simplicity of the exercise, the  
22 loaded element of the exercise, and the self-dosage of the exercise.  
23

## 24 **Theme 5: physiotherapists' development**

25  
26 It is thought that difficulties accessing and understanding research, and professional isolation may act  
27 as barriers to implementation of research into practice.<sup>[25]</sup> Therefore, treating physiotherapists, in  
28 both the usual physiotherapy and intervention groups, were asked to reflect upon their clinical  
29 development. Particularly on beliefs around pain and exercise, and how they have developed their  
30 management approach to PFP. There was a common theme amongst all physiotherapists of clinical  
31 development over the preceding few years, with concomitant changes within their management  
32 approaches. This reflection attributed some of this development, in part, to working within a  
33 department where clinical trials were being undertaken, with exposure to contemporary thinking and  
34 practice. This reflection attributed some of this development, in part, to working within a  
35 department where clinical trials were being undertaken, with exposure to contemporary thinking and  
36 practice.  
37  
38

39  
40 *"I don't think I ever would have said to people, "Don't push into any pain." I think over the*  
41 *years I've probably got-- as research projects and things we've done where we're kind of*  
42 *talking more about it being okay to push into pain, I've got more relaxed with it... I think maybe*  
43 *as a junior I might have done, to be honest. So probably when I did my first rotation, I might*  
44 *have been saying more, "Very, very low," or, "It needs to be virtually pain free." But as the*  
45 *years have gone on, probably got more and more relaxed with saying it's okay, on the back of,*  
46 *I suppose, of the things that have happened in our department and changes in practice*  
47 *generally." [T1 – Usual Physiotherapy].*  
48  
49

50  
51  
52 *"I think from when I first started practice, it would have been different. So when I first started,*  
53 *I would often tape the knee, or if they came back and said that it was painful, I asked them to*  
54 *kind of back off. Almost think about off-loading the knee if it was painful. So trying to reduce*  
55 *activity if it was sore. And then I think just as I became more experienced and read more about*  
56 *that type of thing, I got more confident in not using adjunct and trying to use loaded exercise*  
57 *and reassurance about pain. So I think it fits more with my current practice, and I don't think*  
58  
59  
60

1  
2  
3 *it was that different. Obviously, I do a lot of pain education with back patients, so I think that*  
4 *was quite easily transferable.” [T8 – Loaded Self-Managed].*  
5  
6

7 Department culture has been identified in previous qualitative work as a facilitator or barrier to  
8 change, over and above research evidence and clinical guidelines,<sup>[26,27]</sup> and the physiotherapists within  
9 this study also reflected upon department culture as a driver of practice.  
10

11 *“I guess in this department we're quite used to doing that sort of intervention for these*  
12 *patients, so it wasn't particularly ground-breaking to me, in a nice way [laughter]. It's your*  
13 *[the researcher's] fault.” [T2 – Loaded Self-Managed].*  
14  
15

---

16  
17 *“Oh, it is working in a different environment as well. So when I was in \*\* I was most of the time*  
18 *by myself in a GP clinic. And you don't get a lot of interaction. That influence, when you actually*  
19 *have a bigger [department]. We talk about loading as well. So we talk about Achilles or*  
20 *tendons and we just keep talking about how everything changes and you just do your own*  
21 *research and you think, "Okay." How to make it better.” [T9 – Usual Physiotherapy].*  
22  
23  
24

25 Two physiotherapists discussed how being part of the research challenged their current practice and  
26 resulted in clinical development to both patients with and without PFP. One physiotherapist conferred  
27 how the training package and personal reflection of treating study patients challenged him; the second  
28 from sparking an interest in research.  
29

30  
31 *“I think if you tell them, "Actually, how do you feel about it. You're in control," gives them the*  
32 *onus to take what they do. That's definitely changed massively. And I kind of do that with other*  
33 *patients now as well, not just the knee patients. I'm a little less strict on sets and reps. I'm more*  
34 *do what you feel you can. If you're happier, push on a little bit more.” [T3 – Loaded Self-*  
35 *Managed].*  
36  
37  
38  
39  
40  
41  
42  
43  
44  
45  
46  
47  
48  
49  
50  
51  
52  
53  
54  
55  
56  
57  
58  
59  
60

## Discussion

### Main Findings

In respect to barriers and facilitators, the five major overlapping themes that emerged from the data were: (1) locus of control; (2) belief and attitude to pain; (3) treatment expectations and preference; (4) participants' engagement with the loaded self-managed exercises; and (5) physiotherapists' clinical development. Locus of control was one overarching theme that was evident throughout.

The aim of this qualitative study was to identify barriers and facilitators to the implementation of a loaded self-management exercise programme, which included education and advice on physical activity. Contrary to popular concerns relating to adherence of painful exercises,<sup>[6,19,28]</sup> all patients in the intervention group reported positive engagement. However, flare-ups from over dosing occasionally happened, with some patients expressing concern over reoccurring thoughts of 'tissue damage'; this may be relevant to all patients receiving an exercise programme. This topic needs additional emphasis in any future training programme delivered to the physiotherapists. Previous research has identified physiotherapists' negative beliefs around pain and exercise as a potential barrier to loaded exercises,<sup>[8]</sup> but this was not apparent with the physiotherapists from both groups interviewed in this study.

A key aspect of the loaded self-managed exercise programme is the single exercise method. Previous research with a similar approach in patients with shoulder pain identified this as a potential barrier to implementation, with physiotherapists and patients viewing this with a degree of uncertainty and scepticism.<sup>[7,8]</sup> However, contrary to this research, and despite not aligning with the physiotherapists' usual practice, both physiotherapists and patients generally viewed the single exercise approach in a positive manner. Furthermore, there was a general underlying acknowledgement of the key benefits of a single exercise approach, from both patients and physiotherapists, in terms of a time-saving approach aimed at optimising adherence, and improved dosage monitoring.

Locus of control is thought to predict health-related behaviours and physical activity,<sup>[29]</sup> with an important concept that it may predict healthcare utilisation.<sup>[30]</sup> Locus of control and the psychological construct of self-efficacy has overlapping meaning, where it relates to the power of thinking in achieving treatment outcomes.<sup>[15]</sup> The loaded self-managed exercise programme is designed around optimisation of self-management and self-efficacy. For example, the progressive hierarchy of exercises<sup>[16]</sup>; self-dosage of the exercise; mastery of a single exercise approach; and self-management strategies for physical activity engagement, providing the foundations for self-management of flare-ups, are intended to reduce the need for direct physiotherapy intervention. It has been shown that the lack of belief in one's own ability to manage and function despite pain is a significant predictor of which individuals with pain become disabled or depressed, with regression analysis showing that self-efficacy mediates the relationship between pain and disability.<sup>[31]</sup> Within the context of this study, patients in the intervention group described narratives that could be conceptualised as self-efficacious with greater internal locus of control, compared with patients in the usual physiotherapy group. This could be seen particularly in relation to return to physical activity; belief and attitude to pain; engagement of the intervention with self-dosage of the therapeutic exercise; and self-management.

## Clinical and research implications

Previous qualitative work has suggested that department culture is a key driver or barrier to change.<sup>[26,27]</sup> Indeed, there were clear examples of department culture within this study directly driving recent changes in physiotherapists' clinical practice. This matched previous physiotherapy qualitative work that has identified reflexion of practice and implementation of change, perhaps expeditiously, in physiotherapists who are directly engaged in research.<sup>[8]</sup> With recent research demonstrating that research active hospitals have better patient outcomes,<sup>[32]</sup> this may be considered a good thing. However, the results of this qualitative study suggest that in departments which are actively engaged with research, clinical practice may be driven by members of the research team, in lieu of definitive research results or clinical guidelines. Considering the lead researcher works in the department where the interviews were conducted, and may in part drive department culture, implementation of the intervention in other departments may be more complicated.

Implementation fidelity refers to the degree by which the delivery of an intervention adheres to the protocol and description.<sup>[32]</sup> Physiotherapists delivering usual physiotherapy differed from the UK's usual practice, and best practice guidelines, largely with regards to the advice given on tolerable levels of pain during exercise and physical activity, and how the number and repetitions of the exercises are prescribed.<sup>[19,24]</sup> Cluster randomisation is one way of overcoming this problem.

This research demonstrates that even though physiotherapists have certain expectations around management and exercise prescription, their approach was adaptable to the intervention with only two, two-hour training sessions; enabling patients to self-manage and make sensible decisions about their own treatment and return to physical activity. The results of this study establish a skillset needed to deliver the intervention, including: complex musculoskeletal assessment; anatomy; tissue healing and remodelling; pain biology; peripheral and central sensitisation; psychological and social factors that might affect pain perception; self-management strategies; and education skills. Currently, in the UK, these skills form part of the degree training programme for physiotherapy, further supplemented by the research training package.

## Study limitations and strengths

Two authors independently coded all transcripts, and used a clear, transparent and reproducible methodological approach to data analysis. The author's clinical and research experience lie within the biopsychosocial framework of musculoskeletal pain. It is worth noting that the interviewer made it explicit to the participants that he was a physiotherapist working in the department conducting the research.

Despite efforts to the contrary, the main limitations of this study were the difficulty in interviewing patients lost to follow-up (from both treatment groups) and those classed as non-responders in the experimental intervention group. Four patients were contacted who failed to return any outcome measures, and initially agreed to be interviewed; unfortunately, they failed to attend.

The study population comprised of a single clinical setting, where the researcher was also a clinician and where clinical trials are often undertaken; it is unknown how transferable the intervention is without the relevant physiotherapy training package.

## Conclusion

This qualitative paper has identified some of the barriers and facilitators with participants (physiotherapists and patients) with the delivery of a loaded self-managed exercise programme, with education and advice on physical activity.

From the patients' perspective, facilitators to engagement included effective education around: self-management on exercise dosage; physical activity; and flare-ups. This facilitation may have been mediated, in some part, to enhancements of self-efficacy and internalised locus of control. From the physiotherapists' perspective, these results highlight the importance of 'control' and self-management during their assessment and management of patients with PFP.

For most physiotherapists there was some similarity between their usual practice and the loaded self-managed intervention with regards to the advice given on tolerable levels of pain during exercise and physical activity, with a large degree of heterogeneity of precise terminology used. However, this study demonstrated that the department's recent changes in the clinical practice may have been driven by members of the research team. Therefore, despite these findings, it may be astute to consider this in the context of the UK's usual management approach for PFP, which showed that a large proportion of practising physiotherapists would advise a patient to cease exercise or physical activity if they experience pain. Therefore, implementation into general clinical practice may be challenging, but, ultimately feasible.

## Authors' contributions

BES was responsible for conception and design, compiling the interview schedule, interviewing, transcribing, coding, analysis and interpretation, drafting and revising the manuscript. FM was responsible for conception and design, compiling the interview schedule, coding, analysis and interpretation, drafting and revising the manuscript. PH, MB, JS, MR, TS and PL were involved in conception and design, interpretation and reviewing revisions to the manuscript. All authors have read and approved of the final manuscript.

## Funding

This report is independent research arising from a Clinical Doctoral Research Fellowship, Benjamin Smith, ICA-CDRF-2015-01-002 supported by the National Institute for Health Research (NIHR) and Health Education England (HEE). The views expressed in this publication are those of the author(s) and not necessarily those of the NHS, the NIHR, HEE or the Department of Health. Dr Toby Smith is supported by funding from the National Institute for Health Research (NIHR) Oxford Health Biomedical Research Centre.

## Competing interests

The authors declare that they have no competing interests.

## Ethics approval

This study was approved by the West Midlands - Black Country Research Ethics Committee (16/WM/0414) and Sponsored by Derby Teaching Hospitals NHS Foundation Trust. IRAS reference 211417.

## Availability of data

Further quotations are available from Benjamin Smith at [benjamin.smith3@nhs.net](mailto:benjamin.smith3@nhs.net). No additional data available.

For peer review only

## References

- 1 Smith BE, Selfe J, Thacker D, *et al.* Incidence and prevalence of patellofemoral pain: A systematic review and meta-analysis. *PLoS One* 2018;13(1). doi:10.1371/journal.pone.0190892
- 2 Smith BE, Moffatt F, Hendrick P, *et al.* The experience of living with patellofemoral pain—loss, confusion and fear-avoidance: a UK qualitative study. *BMJ Open* 2018;8:e018624.
- 3 Maclachlan LR, Collins NJ, Matthews MLG, *et al.* The psychological features of patellofemoral pain: a systematic review. *Br J Sports Med* 2017;51:732–42. doi:10.1136/bjsports-2016-096705
- 4 Maclachlan LR, Matthews M, Hodges PW, *et al.* The psychological features of patellofemoral pain: a cross-sectional study. *Scand J Pain* 2018.
- 5 Smith BE, Hendrick P, Bateman M, *et al.* Study protocol: a mixed methods feasibility study for a loaded self-managed exercise programme for patellofemoral pain. *Pilot Feasibility Stud* 2017;4. doi:10.1186/s40814-017-0167-2
- 6 Jack K, McLean SM, Moffett JK, *et al.* Barriers to treatment adherence in physiotherapy outpatient clinics: A systematic review. *Man. Ther.* 2010;15:220–8.
- 7 Littlewood C, Malliaras P, Mawson S, *et al.* Patients with rotator cuff tendinopathy can successfully self-manage, but with certain caveats: a qualitative study. *Physiotherapy* 2014;100:80–5.
- 8 Littlewood C, Mawson S, May S, *et al.* Understanding the barriers and enablers to implementation of a self-managed exercise intervention: a qualitative study. *Physiotherapy* 2015;101:279–85.
- 9 Pope C, Ziebland S, Mays N. Analysing Qualitative Data. *Qual Res Heal Care* Published Online First: 2000. doi:10.1136/bmj.320.7227.114
- 10 Tong A, Sainsbury P, Craig J. Consolidated criteria for reporting qualitative research (COREQ): a 32-item checklist for interviews and focus groups. *Int J Qual Heal care* 2007;19:349–57.
- 11 Braun V, Clarke V. Using thematic analysis in psychology. *Qual Res Psychol* 2006;3:77–101.
- 12 Jones S, Hanchard N, Hamilton S, *et al.* A qualitative study of patients' perceptions and priorities when living with primary frozen shoulder. *BMJ Open* 2013;3:e003452.
- 13 Gale NK, Heath G, Cameron E, *et al.* Using the framework method for the analysis of qualitative data in multi-disciplinary health research. *BMC Med Res Methodol* 2013;13:117.
- 14 Zimbardo PG. Psychology and life. *Glenview, IL: Scott, Foresman* 1985.
- 15 Myers AM, Powell LE, Maki BE, *et al.* Psychological indicators of balance confidence: relationship to actual and perceived abilities. *Journals Gerontol Ser A Biol Sci Med Sci* 1996;51:M37–43.
- 16 Petruzzello SJ, Landers DM, Hatfield BD, *et al.* A meta-analysis on the anxiety-reducing effects of acute and chronic exercise. *Sport Med* 1991;11:143–82.
- 17 Schers H, Wensing M, Huijsmans Z, *et al.* Implementation barriers for general practice guidelines on low back pain: a qualitative study. *Spine (Phila Pa 1976)* 2001;26:E348–53.
- 18 Bernhardsson S, Larsson MEH, Johansson K, *et al.* 'In the physio we trust': A qualitative study

- 1  
2  
3 on patients' preferences for physiotherapy. *Physiother Theory Pract* 2017;33:535–49.  
4
- 5 19 Smith BE, Hendrick P, Bateman M, *et al.* Current Management Strategies for Patellofemoral  
6 Pain: An online survey of 99 practising UK physiotherapists. *BioMed Cent Musculoskelet Disord*  
7 2017;18. doi:10.1186/s12891-017-1539-8  
8
- 9 20 Houben RMA, Ostelo RWJG, Vlaeyen JWS, *et al.* Health care providers' orientations towards  
10 common low back pain predict perceived harmfulness of physical activities and  
11 recommendations regarding return to normal activity. *Eur J Pain* 2005;9:173–83.  
12 doi:10.1016/j.ejpain.2004.05.002  
13
- 14 21 Holden MA, Nicholls EE, Young J, *et al.* UK-based physical therapists' attitudes and beliefs  
15 regarding exercise and knee osteoarthritis: findings from a mixed-methods study. *Arthritis*  
16 *Rheum* 2009;61:1511–21. doi:10.1002/art.24829  
17
- 18 22 Darlow B, Fullen BM, Dean S, *et al.* The association between health care professional attitudes  
19 and beliefs and the attitudes and beliefs, clinical management, and outcomes of patients with  
20 low back pain: a systematic review. *Eur J Pain* 2012;16:3–17. doi:10.1016/j.ejpain.2011.06.006  
21
- 22 23 Nijs J, Roussel N, Paul van Wilgen C, *et al.* Thinking beyond muscles and joints: Therapists' and  
23 patients' attitudes and beliefs regarding chronic musculoskeletal pain are key to applying  
24 effective treatment. *Man Ther* 2013;18:96–102.  
25
- 26 24 Barton CJ, Lack S, Hemmings S, *et al.* The 'Best Practice Guide to Conservative Management of  
27 Patellofemoral Pain': incorporating level 1 evidence with expert clinical reasoning. *Br J Sports*  
28 *Med* 2015;49:923–34. doi:10.1136/bjsports-2014-093637  
29
- 30 25 Metcalfe C, Lewin R, Wisher S, *et al.* Barriers to implementing the evidence base in four NHS  
31 therapies: dietitians, occupational therapists, physiotherapists, speech and language  
32 therapists. *Physiotherapy* 2001;87:433–41.  
33
- 34 26 Gabbay J, le May A. Evidence based guidelines or collectively constructed 'mindlines?'  
35 Ethnographic study of knowledge management in primary care. *Bmj* 2004;329:1013.  
36
- 37 27 Lowe A, Littlewood C, McLean S. Understanding physical activity promotion in physiotherapy  
38 practice: A qualitative study. *Musculoskelet Sci Pract* 2018.  
39
- 40 28 McLean SM, Burton M, Bradley L, *et al.* Interventions for enhancing adherence with  
41 physiotherapy: A systematic review. *Man Ther* 2010;15:514–21.  
42 doi:10.1016/j.math.2010.05.012  
43
- 44 29 Grisolia JM, Longo A, Hutchinson G, *et al.* Applying Health Locus of Control and Latent Class  
45 Modelling to food and physical activity choices affecting CVD risk. *Soc Sci Med* 2015;132:1–10.  
46
- 47 30 Mautner D, Peterson B, Cunningham A, *et al.* How Multidimensional Health Locus of Control  
48 predicts utilization of emergency and inpatient hospital services. *J Health Psychol* 2017;22:314–  
49 23.  
50
- 51 31 Arnstein P, Caudill M, Mandle CL, *et al.* Self efficacy as a mediator of the relationship between  
52 pain intensity, disability and depression in chronic pain patients. *Pain* 1999;80:483–91.  
53
- 54 32 Ozdemir BA, Karthikesalingam A, Sinha S, *et al.* Research activity and the association with  
55 mortality. *PLoS One* 2015;10:e0118253.  
56  
57  
58  
59  
60



## Consolidated criteria for reporting qualitative studies (COREQ): 32-item checklist

Developed from:

Tong A, Sainsbury P, Craig J. Consolidated criteria for reporting qualitative research (COREQ): a 32-item checklist for interviews and focus groups. *International Journal for Quality in Health Care*. 2007. Volume 19, Number 6: pp. 349 – 357

**YOU MUST PROVIDE A RESPONSE FOR ALL ITEMS. ENTER N/A IF NOT APPLICABLE**

| No. Item                                       | Guide questions/description                                                                                                                              | Reported on Page # |
|------------------------------------------------|----------------------------------------------------------------------------------------------------------------------------------------------------------|--------------------|
| <b>Domain 1: Research team and reflexivity</b> |                                                                                                                                                          |                    |
| <i>Personal Characteristics</i>                |                                                                                                                                                          |                    |
| 1. Interviewer/facilitator                     | Which author/s conducted the interview or focus group?                                                                                                   | Page 5             |
| 2. Credentials                                 | What were the researcher's credentials?<br>E.g. PhD, MD                                                                                                  | Page 5             |
| 3. Occupation                                  | What was their occupation at the time of the study?                                                                                                      | Page 5             |
| 4. Gender                                      | Was the researcher male or female?                                                                                                                       | Page 5             |
| 5. Experience and training                     | What experience or training did the researcher have?                                                                                                     | Page 5             |
| <i>Relationship with participants</i>          |                                                                                                                                                          |                    |
| 6. Relationship established                    | Was a relationship established prior to study commencement?                                                                                              | Page 5             |
| 7. Participant knowledge of the interviewer    | What did the participants know about the researcher? e.g. personal goals, reasons for doing the research                                                 | Page 5             |
| 8. Interviewer characteristics                 | What characteristics were reported about the interviewer/facilitator? e.g. Bias, assumptions, reasons and interests in the research topic                | Page 5 & 17        |
| <b>Domain 2: study design</b>                  |                                                                                                                                                          |                    |
| <i>Theoretical framework</i>                   |                                                                                                                                                          |                    |
| 9. Methodological orientation and Theory       | What methodological orientation was stated to underpin the study? e.g. grounded theory, discourse analysis, ethnography, phenomenology, content analysis | Page 5             |
| <i>Participant selection</i>                   |                                                                                                                                                          |                    |
| 10. Sampling                                   | How were participants selected? e.g. purposive, convenience, consecutive, snowball                                                                       | Page 5             |
| 11. Method of approach                         | How were participants approached? e.g. face-to-face, telephone, mail, email                                                                              | Page 5             |
| 12. Sample size                                | How many participants were in the study?                                                                                                                 | Page 5             |

|                                        |                                                                                                                                 |            |
|----------------------------------------|---------------------------------------------------------------------------------------------------------------------------------|------------|
| 13. Non-participation                  | How many people refused to participate or dropped out? Reasons?                                                                 | Page 17    |
| <i>Setting</i>                         |                                                                                                                                 |            |
| 14. Setting of data collection         | Where was the data collected? e.g. home, clinic, workplace                                                                      | Page 5     |
| 15. Presence of non-participants       | Was anyone else present besides the participants and researchers?                                                               | Page 5     |
| 16. Description of sample              | What are the important characteristics of the sample? e.g. demographic data, date                                               | Page 7 & 8 |
| <i>Data collection</i>                 |                                                                                                                                 |            |
| 17. Interview guide                    | Were questions, prompts, guides provided by the authors? Was it pilot tested?                                                   | Page 6     |
| 18. Repeat interviews                  | Were repeat inter views carried out? If yes, how many?                                                                          | N/A        |
| 19. Audio/visual recording             | Did the research use audio or visual recording to collect the data?                                                             | Page 6     |
| 20. Field notes                        | Were field notes made during and/or after the inter view or focus group?                                                        | Page 6     |
| 21. Duration                           | What was the duration of the inter views or focus group?                                                                        | Page 7     |
| 22. Data saturation                    | Was data saturation discussed?                                                                                                  | Page 5     |
| 23. Transcripts returned               | Were transcripts returned to participants for comment and/or correction?                                                        | No         |
| <b>Domain 3: analysis and findings</b> |                                                                                                                                 |            |
| <i>Data analysis</i>                   |                                                                                                                                 |            |
| 24. Number of data coders              | How many data coders coded the data?                                                                                            | Page 6     |
| 25. Description of the coding tree     | Did authors provide a description of the coding tree?                                                                           | N/A        |
| 26. Derivation of themes               | Were themes identified in advance or derived from the data?                                                                     | Page 6     |
| 27. Software                           | What software, if applicable, was used to manage the data?                                                                      | NVivo      |
| 28. Participant checking               | Did participants provide feedback on the findings?                                                                              | No         |
| <i>Reporting</i>                       |                                                                                                                                 |            |
| 29. Quotations presented               | Were participant quotations presented to illustrate the themes/findings? Was each quotation identified? e.g. participant number | Results    |
| 30. Data and findings consistent       | Was there consistency between the data presented and the findings?                                                              | Discussion |
| 31. Clarity of major themes            | Were major themes clearly presented in the findings?                                                                            | RESULTS    |
| 32. Clarity of minor themes            | Is there a description of diverse cases or discussion of minor themes?                                                          | Discussion |

**Once you have completed this checklist, please save a copy and upload it as part of your submission. When requested to do so as part of the upload process, please select the file type: *Checklist*. You will NOT be able to proceed with**

1  
2  
3  
4  
5  
6  
7  
8  
9  
10  
11  
12  
13  
14  
15  
16  
17  
18  
19  
20  
21  
22  
23  
24  
25  
26  
27  
28  
29  
30  
31  
32  
33  
34  
35  
36  
37  
38  
39  
40  
41  
42  
43  
44  
45  
46  
47  
48  
49  
50  
51  
52  
53  
54  
55  
56  
57  
58  
59  
60

**submission unless the checklist has been uploaded. Please DO NOT include this checklist as part of the main manuscript document. It must be uploaded as a separate file.**

For peer review only

# BMJ Open

## Barriers and facilitators of loaded self-managed exercises and physical activity in people with patellofemoral pain: understanding the feasibility of delivering a multi-centred randomised controlled trial – A UK qualitative study

|                                 |                                                                                                                                                                                                                                                                                                                                                                                                                                                                                                                                                                                                                                                                                                                                                                                                 |
|---------------------------------|-------------------------------------------------------------------------------------------------------------------------------------------------------------------------------------------------------------------------------------------------------------------------------------------------------------------------------------------------------------------------------------------------------------------------------------------------------------------------------------------------------------------------------------------------------------------------------------------------------------------------------------------------------------------------------------------------------------------------------------------------------------------------------------------------|
| Journal:                        | <i>BMJ Open</i>                                                                                                                                                                                                                                                                                                                                                                                                                                                                                                                                                                                                                                                                                                                                                                                 |
| Manuscript ID                   | bmjopen-2018-023805.R1                                                                                                                                                                                                                                                                                                                                                                                                                                                                                                                                                                                                                                                                                                                                                                          |
| Article Type:                   | Research                                                                                                                                                                                                                                                                                                                                                                                                                                                                                                                                                                                                                                                                                                                                                                                        |
| Date Submitted by the Author:   | 14-Jan-2019                                                                                                                                                                                                                                                                                                                                                                                                                                                                                                                                                                                                                                                                                                                                                                                     |
| Complete List of Authors:       | Smith, Benjamin; University Hospitals of Derby and Burton NHS Foundation Trust; University of Nottingham<br>Moffatt, Fiona; University of Nottingham<br>Hendrick, Paul ; University of Nottingham<br>Bateman, Marcus; University Hospitals of Derby and Burton NHS Foundation Trust<br>Selfe, James; Manchester Metropolitan University, Department of Health Professions<br>Rathleff, Michael ; Department of Clinical Medicine at Aalborg University, Research Unit for General Practice in Aalborg; Aalborg University Hospital, Department of Occupational Therapy and Physiotherapy, Department of Clinical Medicine<br>Smith, Toby O.; University of Oxford , Nuffield Department of Orthopaedics, Rheumatology and Musculoskeletal Sciences<br>Logan, Phillipa; University of Nottingham |
| <b>Primary Subject Heading</b>: | Qualitative research                                                                                                                                                                                                                                                                                                                                                                                                                                                                                                                                                                                                                                                                                                                                                                            |
| Secondary Subject Heading:      | Sports and exercise medicine                                                                                                                                                                                                                                                                                                                                                                                                                                                                                                                                                                                                                                                                                                                                                                    |
| Keywords:                       | patellofemoral pain, PFP, QUALITATIVE RESEARCH, REHABILITATION MEDICINE                                                                                                                                                                                                                                                                                                                                                                                                                                                                                                                                                                                                                                                                                                                         |
|                                 |                                                                                                                                                                                                                                                                                                                                                                                                                                                                                                                                                                                                                                                                                                                                                                                                 |

SCHOLARONE™  
Manuscripts

1  
2  
3  
4  
5  
6  
7  
8  
9

## **Barriers and facilitators of loaded self-managed exercises and physical activity in people with patellofemoral pain: understanding the feasibility of delivering a multi-centred randomised controlled trial – A UK qualitative study**

10 Benjamin E Smith<sup>1,2,\*</sup>, Fiona Moffatt<sup>3</sup>, Paul Hendrick<sup>3</sup>, Marcus Bateman<sup>1</sup>, James Selfe<sup>4</sup>, Michael Skovdal Rathleff<sup>5,6</sup>, Toby O Smith<sup>7</sup>, Phillipa Logan<sup>2</sup>

11  
12  
13  
14  
15  
16  
17  
18

<sup>1</sup>University Hospitals of Derby and Burton NHS Foundation Trust, Physiotherapy Department (Level 3), London Road Community Hospital, Derby DE1 2QY, UK

19  
20  
21  
22

<sup>2</sup>Division of Rehabilitation and Ageing, School of Medicine, University of Nottingham, Nottingham, UK

23  
24  
25

<sup>3</sup>Division of Physiotherapy and Rehabilitation Sciences, School of Health Sciences, University of Nottingham, Nottingham University Hospitals (City Campus), Nottingham, UK.

26  
27

<sup>4</sup>Department of Health Professions, Manchester Metropolitan University, Manchester, UK

28  
29  
30  
31

<sup>5</sup>Research Unit for General Practice in Aalborg, Department of Clinical Medicine at Aalborg University, Aalborg, Denmark

32  
33  
34

<sup>6</sup>Department of Occupational Therapy and Physiotherapy, Department of Clinical Medicine, Aalborg University Hospital, Denmark

35  
36  
37

<sup>7</sup>Nuffield Department of Orthopaedics, Rheumatology and Musculoskeletal Sciences, University of Oxford, UK

38  
39  
40  
41  
42  
43  
44  
45  
46  
47  
48  
49  
50  
51  
52  
53  
54  
55  
56  
57  
58  
59  
60

\*Corresponding author. Tel: 01332 254631 Email: [benjamin.smith3@nhs.net](mailto:benjamin.smith3@nhs.net)

## Abstract

### Objectives:

There is an emergent body of evidence supporting exercise therapy and physical activity in the management of musculoskeletal pain. The purpose of this study was to explore potential barriers and facilitators with patients and physiotherapists with patellofemoral pain involved in a feasibility randomised controlled trial (RCT) study. The trial investigated a loaded self-managed exercise intervention, which included education and advice on physical activity versus usual physiotherapy as the control.

### Design:

Qualitative study, embedded within a mixed-methods design, using semi-structured interviews.

### Setting:

A UK National Health Service physiotherapy clinic in a large teaching hospital.

### Participants:

Purposively sampled 20 participants within a feasibility RCT study; 10 patients with a diagnosis of patellofemoral pain, aged between 18 and 40, and 10 physiotherapists delivering the interventions.

### Results:

In respect to barriers and facilitators, the five overlapping themes that emerged from the data were: (1) locus of control; (2) belief and attitude to pain; (3) treatment expectations and preference; (4) participants' engagement with the loaded self-managed exercises; and (5) physiotherapists' clinical development. Locus of control was one overarching theme that was evident throughout.

Contrary to popular concerns relating to painful exercises, all participants in the intervention group reported positive engagement. Both physiotherapists and patients, in the intervention group, viewed the single exercise approach in a positive manner. Participants within the intervention group described narratives demonstrating self-efficacy, with greater internal locus of control compared to those who received usual physiotherapy, particularly in relation to physical activity.

### Conclusions:

Implementation, delivery and evaluation of the intervention in clinical settings may be challenging, but feasible with the appropriate training for physiotherapists.

Participants' improvements in pain and function may have been mediated, in some part, by greater self-efficacy and locus of control.

### Trial registration:

ISRCTN 35272486

## Article Summary

### Strengths and limitations of this study:

- This paper identified, through interviews, key barriers and facilitators to implementation of a loaded self-managed exercise programme, with education and advice on physical activity.
- Two authors independently coded all transcripts, and a clear, transparent and reproducible methodological approach was used in the analysis.
- The main limitations of this study were the difficulty in interviewing patients lost to follow-up (from both groups) and finding patients classed as 'non-responders' in the loaded self-managed group.
- The study population comprised of a single clinical setting, where the researcher was also a clinician.

Word Count: 6,530

For peer review only

## Introduction

Patellofemoral pain (PFP) is one of the most common forms of knee pain in adults under the age of 40 years, with an estimated prevalence of 23% in the general population.<sup>[1]</sup> Many individuals with PFP develop associated pain-related fear, such as fear-avoidance and catastrophising thoughts in relation to their knee pain.<sup>[2-4]</sup>

This research was undertaken within a framework of mixed-methods, embedded within a feasibility study comparing a loaded self-managed exercise protocol with usual physiotherapy for people with PFP.<sup>[5]</sup> The loaded self-managed exercise programme is a novel intervention based on pain science (where a single exercise is designed to load and temporarily aggravate patients' symptoms), self-management strategies and improvements in physical activity levels.<sup>[5]</sup> Usual physiotherapy can be described as a mixed packaged (multi-model) approach of 'trial-and-error' exercises, patellar taping and bracing, and foot orthoses. It is typically aimed at reducing the load on the patella, with avoidance of painful exercise.<sup>[6,7]</sup>

The loaded self-managed exercise programme does not align with current UK physiotherapists' preferred treatment approach for PFP.<sup>[7]</sup> Protocols that use loaded exercises are typically painful to perform,<sup>[5]</sup> though increased pain levels during exercise is often cited as a strong predictor of poor adherence.<sup>[8]</sup> Secondly, pain education and increasing physical activity require a certain level of self-management and personal responsibility on the part of the patient, also strong predictors of poor exercise adherence.<sup>[8]</sup> And thirdly, a key aspect of the loaded self-managed exercise programme is the single exercise method, which physiotherapists and patients historically viewed with a degree of scepticism, when used in treating shoulder pain.<sup>[9,10]</sup>

Therefore, this qualitative investigation aimed to explore potential barriers and facilitators to implementation of the intervention with participants with PFP involved in a feasibility randomised controlled trial (RCT),<sup>[5]</sup> with acknowledgment that qualitative inquiry can provide an insight that may lead to development of ideas and hypothesis generation.



## Method

A qualitative study was conducted embedded within a mixed-methods feasibility study. To avoid cross-contamination between the two groups the intervention group was treated by different qualified physiotherapists, who received the intervention training package, to the usual physiotherapy group. To fully explore the aims of this study patients and physiotherapists receiving and delivering both the intervention and usual physiotherapy were interviewed.<sup>[5]</sup> The framework approach was the most appropriate method for inquiry, as the objectives of the investigation were set *a priori*.<sup>[11]</sup>

This study has been reported in line with the COnsolidated criteria for REporting Qualitative research (COREQ) checklist.<sup>[12]</sup>

This study did not set out to prove or disprove a hypothesis, it set out to generate new data from which an understanding of barriers and facilitators to the intervention and study design might be developed. The authors took an epistemological position described as “contextualist” by Braun and Clarke that sits central on the spectrum of realism and constructivism.<sup>[13]</sup> It recognises the experience at an individual level, whilst considering the wider context within a sociocultural perspective. Through this, the beliefs and perceptions of a person, with any meanings attached, can be explored, whilst considering social and cultural factors. This position has previously been discussed in detail in relation to this mixed-methods study.<sup>[2]</sup>

## Participants

A purposive sample of ten patients with PFP were recruited from the 60 patients who were recruited to a feasibility study, this included patients in the intervention group and those receiving usual physiotherapy. International consensus has defined PFP symptoms as typically developing insidiously with retropatellar pain or diffuse peripatellar pain, aggravated by activities that “load the joint”, such as climbing and descending stairs, squatting, running or jumping.<sup>[14]</sup> Based on similar studies, we anticipated this sample size would be sufficient to reach data saturation.<sup>[9,10]</sup> Patients were selected based on representation of a spectrum of population in terms of: intervention delivered (both the intervention, and usual physiotherapy), age, gender, return of outcome forms, and clinical outcome, as determined by a global rating of change at follow-up measured on a 7-point Likert scale ranging from “completely recovered” to “worse than ever”.<sup>[5]</sup> Clinical responders were defined as “completely recovered” or “strongly recovered”.<sup>[5]</sup> Attempts were made to interview those lost to follow up and non-responders in both groups.

Initial recruitment to the feasibility study included gaining written consent for taking part in future qualitative investigations with consent to audio-recording and to publication of anonymised quotations. Participants were initially followed up by a telephone call. If they agreed, a convenient time was arranged to complete an interview. Participants were given the opportunity to discuss any concerns before the interviews started.

Ten physiotherapists were purposively sampled, this included those delivering the intervention and those delivering usual physiotherapy. Based on similar studies, we anticipated this sample size would be sufficient to reach data saturation.<sup>[9,10]</sup> Again, physiotherapists were selected based on characteristic to represent a spectrum population in terms of: intervention delivered, age, sex and length of time qualified. The physiotherapists initially agreed to take part in the research when

1  
2  
3 briefed during the study intervention training sessions. They were subsequently approached about  
4 the qualitative component of the study via team meetings. Participants were given the opportunity  
5 to read the participant information sheet and to ask any questions before the consent form was  
6 signed.  
7  
8

## 9 **Recruitment**

10 All participants were interviewed at a convenient time in the hospital-based physiotherapy  
11 department. The researcher (BES) introduced himself as a physiotherapist working in that  
12 department, and as a researcher conducting a PhD. The researcher explained the aims of the study.  
13 Verbal consent was taken to start recording.  
14  
15

## 16 **Data Collection**

17 Semi-structured interviews were designed by the researchers (BES and FM) using topic guidelines  
18 with prompts to explore barriers and facilitators to taking part in a loaded self-managed exercise  
19 intervention. Patients from both treatment groups were asked about response to treatment, belief  
20 and attitude to pain, belief and attitude to physical activity, treatment expectations and protocol  
21 parameters. Only those in the intervention group were asked about their engagement with the  
22 loaded self-managed intervention. All physiotherapists were asked about their usual practice,  
23 personal development, belief and attitude to pain, belief and attitude to physical activity and  
24 protocol parameters. Only those delivering the intervention were asked about their engagement  
25 with the loaded self-managed intervention, including the training package. The interviews ranged  
26 from five to 21 minutes (mean time: 11 minutes) in duration.  
27  
28  
29  
30

31 The interview guide was not piloted, however the researcher maintained a reflective journal, noting  
32 down initial thoughts and ideas after each interview.<sup>[15]</sup> This identified that the first two interviews  
33 raised matters relating to responsibility and locus of control around return to physical activity. This  
34 was incorporated into subsequent interview schedules for both patients and physiotherapists.  
35  
36  
37

## 38 **Data Analysis**

39 All audio files were collected and transcribed verbatim.  
40

41 The data were analysed using a thematic Framework Method,<sup>[11]</sup> which was the most appropriate  
42 method for inquiry, as the objectives of the investigation were set *a priori*.<sup>[11]</sup> Furthermore, data  
43 analysis can be conducted systematically, allowing the data to be explored in depth while  
44 simultaneously maintaining an effective and transparent audit trail.<sup>[11]</sup> During transcription, initial  
45 thoughts and ideas were noted in the reflective journal. Audio files were listened to several times to  
46 check for accuracy, and transcriptions were read and re-read a number of times; this data  
47 familiarisation further informed the development of a thematic framework. Following  
48 familiarisation, both authors agreed on the initial thematic framework. Data coding then identified  
49 and coded pertinent features of the data giving equal priority over the whole dataset. These steps  
50 were independently conducted by two researchers (BES & FM) who met to compare codes. This  
51 formed a working analytical framework upon which the data were examined. The transcripts were  
52 then indexed using the categories and codes on the working framework. During this process, the  
53 data were organised according to the defined thematic framework. Charting was then used to  
54 summarise and display the data by category and theme for each transcript.<sup>[11,16]</sup> Indexing was  
55  
56  
57  
58  
59  
60

initiated by one researcher (BES), prior to charting, and subsequently developed and verified by a second researcher (FM).

Data were organised and analysed using QSR International's NVivo 11. After 10 interviews per group, it was determined by the researchers that data saturation had occurred as no new thoughts or concepts were generated in the later interviews.

## Patient and Public Involvement

This research project has been driven by the views of people suffering from PFP. Patients were consulted for their views, including patient members of the Steering Group Committee. Thoughts and preferences to current programmes of therapy and treatment were requested, and these views have been incorporated into the planning, design, application and dissemination of this study.

## Results

The 10 patients included three men and seven women, aged between 26 to 37 years (mean: 30.6 years), with a diagnosis of PFP for a mean duration of 25 months (range: 3 months to 10 years). The 10 physiotherapists included two men and eight women, aged between 24 to 58 years (mean: age 39.4 years), with a mean of 16 years qualified (range: 3 years to 37 years). Full patient and physiotherapist characteristics are presented in Table 1 and Table 2 respectively.

**Table 1 Characteristics of patients**

| Participant Number | Gender | Intervention Received  | Clinical Responder |
|--------------------|--------|------------------------|--------------------|
| P1                 | M      | Intervention           | Responder          |
| P2                 | M      | Usual<br>Physiotherapy | Non-<br>responder  |
| P3                 | F      | Usual<br>Physiotherapy | Non-<br>responder  |
| P4                 | F      | Usual<br>Physiotherapy | Responder          |
| P5                 | F      | Intervention           | Responder          |
| P6                 | F      | Usual<br>Physiotherapy | Non-<br>responder  |
| P7                 | F      | Usual<br>Physiotherapy | Responder          |
| P8                 | F      | Intervention           | Non-<br>responder  |
| P9                 | M      | Intervention           | Responder          |
| P10                | F      | Intervention           | Responder          |

F, female; M, male

**Table 2 Characteristics of physiotherapists**

| Therapist Number | Gender | Intervention Delivered |
|------------------|--------|------------------------|
| T1               | F      | Usual Physiotherapy    |
| T2               | F      | Intervention           |
| T3               | M      | Intervention           |
| T4               | F      | Intervention           |
| T5               | F      | Usual Physiotherapy    |
| T6               | F      | Usual Physiotherapy    |
| T7               | F      | Intervention           |
| T8               | M      | Intervention           |
| T9               | F      | Usual Physiotherapy    |
| T10              | F      | Usual Physiotherapy    |

F, female; M, male

In respect to barriers and facilitators, the five major overlapping themes that emerged from the data were: (1) locus of control; (2) belief and attitude to pain; (3) treatment expectations and preference; (4) participants' engagement with the loaded self-managed exercises; and (5) physiotherapists' clinical development. Locus of control was one overarching theme that was evident throughout. The findings are presented in relation to existing literature.

### **Theme 1: locus of control**

Locus of control is a psychological construct about the degree people believe they have control over their actions and outcomes.<sup>[17]</sup> A key feature of the intervention being evaluated in the RCT, is the self-dosing of exercise, based on the symptomatic response, and the self-managed approach to physical activity. This could be conceptualised as internalising locus of control with the patient, and is thought to predict treatment compliance, acting as a barrier or facilitator to implementation.<sup>[8]</sup> Patients within the intervention group described narratives that could be conceptualised as greater internal locus of control, compared with patients in the usual physiotherapy group.

*R: And how did you feel about being in charge of that [the exercise]?*

*P8: Yeah. I think it was empowering in a way. [Loaded Self-Managed]*

Early interviews raised matters relating to whose authority it was to give the 'permission' to return to, or increase, physical activity; including when and how this should be done. Again, clear differences between usual physiotherapy and the intervention could be seen, particularly in relation to physiotherapists' management approach to physical activity.

1  
2  
3 *"Ultimately up to the patient really. They should feel in charge of what they do. They need to*  
4 *have control of the situation. If they're just waiting for somebody else to dictate that, then*  
5 *they haven't got very good control. But they might need some encouragement or*  
6 *reassurance that it's okay to actually, if you want to get back to these activities you can. You*  
7 *don't need to ask me permission really."* [T2 – Loaded Self-Managed].  
8  
9

---

10  
11 *I would usually kind of bat it back to them and say, "Well, what do you think you can do?"*  
12 *And using the same principles as with the exercises, if you're getting some discomfort at the*  
13 *time, it doesn't mean to say you then stop. And just see how it is afterwards, and then modify*  
14 *how much you're doing in response to how much pain you're experiencing afterwards.* [T4 –  
15 *Loaded Self-Managed].*  
16  
17

18  
19 Contrasting the push for an internal locus of control with the intervention was a narrative discussed  
20 by some patients receiving usual physiotherapy. For example, Participant 4 had indicated she was  
21 'strongly recovered', had minimal pain and had returned to almost all of her usual activity. However,  
22 she had not returned to the gym yet, and had booked a follow-up appointment with the treating  
23 physiotherapist for after the interviews where she hoped to receive the 'go-ahead' to return.  
24  
25

26 And this patient narrative was reinforced by the treating physiotherapists' understanding of their  
27 role:  
28

29  
30 *"I'd assess them functionally. So you kind of break down that hobby or that activity into*  
31 *sections. So if it's a sport, look at part of it... and if you can't do two or three of them, it's not*  
32 *just your knee that's letting you down. Generally, you're not quite ready for that."* [T10 –  
33 *Usual Physiotherapy].*  
34  
35

36 A few of the physiotherapists within the usual physiotherapy group viewed their role more of a  
37 partnership with the patient, where decisions about return to activity were agreed mutually.  
38

39  
40 *"Well, it'd be a mutual thing. A lot of them weren't sporty, but they would ask and we*  
41 *discussed the suitability."* [T5 – Usual Physiotherapy].  
42  
43

44 Locus of control is interrelated to the psychological construct of self-efficacy, where it relates to the  
45 power of thinking in achieving treatment outcomes.<sup>[18]</sup> The loaded self-managed exercise  
46 programme is designed around optimisation of self-management and self-efficacy. For example, the  
47 progressive hierarchy of the exercise demonstrates and provides evidence to the patient that they  
48 are systematically approaching their clinical and personal goals.<sup>[19]</sup> Some patients within the  
49 intervention group expressed views that could be contextualised as self-efficacious in line with this  
50 hierarchy.  
51  
52

53  
54 *"That sense of just you know how much progress you made. A week ago you did 20, and now*  
55 *you did 30 or 40."* [P9 – Loaded Self-Managed].  
56  
57

---

58  
59 *"When I hit the target and I then thought, "Oh, I can actually do a few more," and it's*  
60 *comfortable to do, I did do that."* P5 – Loaded Self-Managed].

## Theme 2: treatment expectations and preference

Previous qualitative work has identified unmet treatment expectation as a potential barrier to treatment adherence,<sup>[20,21]</sup> therefore all patients were asked to reflect upon their expectations, with physiotherapists invited to discuss their usual practice. The predominant patient expectation was that they would receive some form of exercise programme from their physiotherapy, and that this would probably involve some level of pain.

A small number of patients discussed an expectation of hands-on passive treatment.

*"I was more expecting sort of a hands-on approach, more like physio massage when I came."  
[P8 – Loaded Self-Managed].*

Furthermore, in keeping with themes found in other PFP qualitative work,<sup>[2]</sup> several patients established a clear wish for questions to be answered, in relation to causative factors around their pain:

*"For me, I wanted answers on why my knee was painful. Because I think, going back 10 years ago, when I first went to my doctor's, I was told it was ligament damage. And it didn't clear up, and when I went back, it was like, "Well, the waiting list for physio is so long, by the time you get there, you'll be recovered." And then, when I went back again, it was like, "Well, you're too young to have steroid injections." And then, I just always felt I was like, in a sense, sent packing without any answers. And then, I wanted some answers as to why it's hurting so I could understand it." [P10 – Loaded Self-Managed Group]*

Previous qualitative work in patients with PFP found a dominant negative view of physiotherapy,<sup>[2]</sup> with one patient similarly expressing an initial negative view of seeing a physiotherapist.

*"The physio-- I don't know, I was a bit sceptical, to be honest. But yeah, it has given me the result I wanted." [P10 – Loaded Self-Managed].*

All physiotherapists reported that their current practice and preference for treating PFP included an exercise programme. However, in contrast to the majority of UK physiotherapists,<sup>[7]</sup> they all reported an expectation that exercises would be performed with a degree of pain. Though there remained a large amount of heterogeneity in terms of language choice, and what parameters were used, when discussing optimal exercise dosage with patients.

*"But if you think about a VAS or something like that ... probably you wouldn't want your pain to be greater than maybe a 3 or a 4 out of 10." [T1 – Usual Physiotherapy].*

---

*"Quite oftentimes I tell people to do reps to kind of fatigue, but not to pain. So people are getting a bit of a niggle, if they can manage it, and they can bring the pain level back down quite quickly afterwards. So if they can do exercises, it aggravates it, but within about a half an hour symptoms have settled, then that's fine." [T10 – Usual Physiotherapy].*

1  
2  
3 Dissonance between the single exercise approach used in the intervention and treating  
4 physiotherapists' preference was evident. The single exercise approach was not favoured by any of  
5 the physiotherapists interviewed:  
6

7  
8 *"I think possibly the intervention was simpler to do in the fact that it was geared, sort of*  
9 *guided around one exercise. And probably, what I would have done before is perhaps give*  
10 *more exercises and chop and change them maybe a bit more frequently."* [T7 – Loaded Self-  
11 *Managed].*  
12

13  
14 Additionally, some physiotherapists were very prescriptive with their exercise dosage.

15  
16 *"Initially I might start with them with 15 repetitions and work to three sets, two-minute*  
17 *break in between".* [T9 – Usual Physiotherapy].  
18

19  
20 Again, in contrast to the majority of UK physiotherapists,<sup>[7]</sup> and similarly to the experimental  
21 intervention, many of the physiotherapists interviewed in this study (from both groups) would try to  
22 encourage the patient to self-dose their exercise:  
23

24  
25 *"I'm a little less strict on sets and reps. I'm more do what you feel you can. If you're happier,*  
26 *push on a little bit more."* [T3 – Loaded Self-Managed].  
27

28 As identified above, most patients were content with the anticipation that exercises would be  
29 painful, and indeed this matched current clinical practice with the physiotherapists interviewed,  
30 despite not aligning with UK wide current practice.<sup>[7]</sup> Where departmental practice did align itself  
31 more with UK practice, was with regards to the number of exercises prescribed, in clear contrast to  
32 the single exercise approach with the intervention.  
33

### 34 35 **Theme 3: belief and attitude to pain**

36  
37 Interlinked to the all themes, particularly locus of control were patients' and physiotherapists'  
38 beliefs and attitudes to pain. There is a growing body of evidence suggesting that health  
39 practitioners with a biomedical orientation to pain are more likely to advise patients to limit their  
40 physical activity due to pain <sup>[22–24]</sup>; and consequently may induce fear-avoidant behaviours onto their  
41 patients,<sup>[24,25]</sup> acting as a clear barrier to implementation. There were examples in the usual  
42 physiotherapy group of biomedical models of diagnosis and management with misconceptions of  
43 'tissue damage':  
44

45  
46  
47 *"She [the physiotherapist] gave me exercises to do. I've always been keen on the gym. I go to*  
48 *the gym. I was a doing a lot of the stuff she's asking me to do, anyway. Or it's probably more*  
49 *about my technique. I was maybe not doing it as well as I could have done. So I fell back. ...So*  
50 *she referred me for scans on both knees-- well, referred me back to my doctor. My doctor*  
51 *referred me to an orthopaedist. They referred me for a scan on both knees. The MRI scan*  
52 *showed this knee's absolutely fine - which it's not."* [P3 – Usual Physiotherapy].  
53  
54

---

55  
56  
57 *R: So if they're not achieving that, would you advise them not to run then?*

58  
59 *P10: Probably. Yes. I'd probably have a look at them, and if they were really antalgic on their*  
60 *gait, then yeah, tell them not to bother, to work on their weaknesses, and then reassess it a*

1  
2  
3 *bit later down the line. Because otherwise, they might just end up making their knee 10 times*  
4 *worse because they're running on a weakened, less-controlled knee. [Usual Physiotherapy]*  
5  
6

7 Of interest is that the physiotherapist delivering the usual physiotherapy, as described in theme 2,  
8 did describe treatment preference not fully aligned with the majority of UK physiotherapists,<sup>[7]</sup> and  
9 the best practice guidelines,<sup>[6]</sup> in as much as they expressed a belief that pain is acceptable during  
10 exercise. Certainly, this did identify some fidelity and contamination concerns with regards to usual  
11 physiotherapy:  
12

13  
14 *"I think it was sometimes a bit hard to stick to usual physio, because we still keep reading.*  
15 *We try to keep up with what's happening... So it's just a bit of reading and then I change*  
16 *'usual physio', it keeps developing as you work." [T9 – Usual Physiotherapy].*  
17  
18

19 Yet despite this, there was marked differences in the patients' and physiotherapists' beliefs and  
20 attitudes to pain in the intervention group, compared with usual physiotherapy, demonstrating  
21 some re-conceptualisation of pain. This suggests the training programme did improve contemporary  
22 knowledge of pain science.  
23

24  
25 *"Yeah, the pain wasn't excruciating or anything. At no point did I think, "I can't keep doing*  
26 *this." It was a fairly normal level, I'd say. It wasn't anything that would make me come back,*  
27 *and say, "I'm worried that I'm doing something wrong," or anything like that. It was fairly*  
28 *normal. I wouldn't say it was too bad." [P1 – Loaded Self-Managed].*  
29  
30

---

31  
32 *P7: The physiotherapist said to go ahead and run if it wasn't going to do any damage. Yes, if*  
33 *it's painful, stop. [Usual Physiotherapy]*  
34  
35

---

36  
37 *"My own thoughts have been, I think, changed definitely with this intervention. I think*  
38 *exercise is-- I've always said to patients that if it's painful, they can still carry on. But again,*  
39 *like I said, I gave that arbitrary figure. If it goes above this, then maybe taper down... But*  
40 *actually, maybe educating them and telling them, "Pain isn't an indicator of damage. You*  
41 *can push through into it a little bit, but it just has to be something that you're comfortable*  
42 *with." And I think the thing that changed with me saying that to patients was I am not the*  
43 *one that's going to dictate that. You're the one has to go through this." [T3 – Loaded Self-*  
44 *Managed].*  
45  
46  
47

48 There was one example of mixed messages from the patient, with regards to acceptable and  
49 appropriate levels of pain during exercise and physical activity. This may suggest the heterogeneity  
50 in physiotherapy advice, as previously discussed in the second theme with physiotherapists, may  
51 have a negative effect with increasing levels of uncertainty. This is in keeping with previous research  
52 suggesting an iatrogenic effect with physiotherapy treatment for PFP relating to diagnosis  
53 uncertainty and fear-avoidance behaviour.<sup>[2]</sup>  
54  
55

56  
57 *"He [the physiotherapist] recommend that I didn't run, which is probably the only thing I*  
58 *don't do now. I think it was the impact. Like, my knee with my cartilage. That's why he didn't*  
59 *recommend it at that point." [P10 – Loaded Self-Managed].*  
60



## Theme 4: participants' engagement with the loaded self-managed exercises

Only patients and physiotherapists receiving or delivering the intervention were asked to discuss their thoughts about it. Both patients and physiotherapists reported several different ways in which they interacted and connected with the intervention. Firstly, the intervention laid the foundation of re-conceptualisation of pain-related fear where the physiotherapist spent a period of time educating the patient about pain mechanisms.<sup>[5]</sup> Descriptions of tissue-based pathology models of pain, e.g. patellar mal-tracking, or limb mal-alignment were actively discouraged and challenged by the physiotherapist. The aim was for the patient to gain an evidenced-based understanding of dysfunctional central nociceptive processing as an explanation of chronic and persistent pain and the role and impact of fear.

*"Once you'd explained-- all the key is in the explanation about pain and how pain works and explaining why they're doing it from that. And in fact, sort of the particular girl I'm thinking about, she'd stopped going downstairs because of the pain. When I reviewed her last time, she said, "Well, I haven't been avoiding the stairs." [with no increase in pain levels] So it's good stuff." [T7 – Loaded Self-Managed].*

Other critical aspects of the intervention discussed by the participants were the self-dosage of the exercise, based upon the symptomatic response, rather than being prescribed by the physiotherapist. These aspects were all discussed positively, with no negative features identified.

*"I think for me I've got results a lot quicker, so because I was kind of going through the pain with all that. And I definitely stuck with the exercise more, because when I first started with one exercise I might get a bit bored. But I've definitely stuck to it more." [P9 – Loaded Self-Managed]*

The simplicity of a single exercise approach was discussed by all the interviewees, predominantly in a positive manner.

*"So I think it's quite simple, so if I do ever get-- the problem starts to occur again, it's no real problem to just start." [P1 – Loaded Self-Managed].*

However, one physiotherapist admitted to being initially sceptical that one exercise would be enough.

*"And using that single exercise as that treatment. So in terms of my thoughts before, would that be enough for my patients? And the ones I've seen, have seemingly done well with just one exercise, rather than having four or five different exercises to do." [T3 – Loaded Self-Managed].*

The key feature of patients self-dosing their exercise, based on the symptomatic response, is an understanding of when and how to progress or regress the exercise. Patients recognised the role of 'trial and error' in this process, and the relevance of the pain education prior to the exercise programme being implemented.

1  
2  
3 *"I do remember, initially, there being kind of a week or two, maybe, where I was kind of*  
4 *finding kind of the right amount [of the exercise to do]." [P9 – Loaded Self-Managed].*  
5  
6

7  
8 *"I think what you tend to do as physios, we very often tend to be quite prescriptive. And*  
9 *patients do ask that. They want to know how many they should do, how many times a day,*  
10 *whereas this is actually giving them much more their own power of making them decide*  
11 *what they're going to do. So actually, hopefully, then they're going to carry on with it in the*  
12 *future." [T7 – Loaded Self-Managed].*  
13  
14

15 Interlinked to self-dosing was the expected pain flare-ups, when patients over dosed their exercise  
16 or physical activity. The physiotherapists' training programme at the start of the feasibility study  
17 covered this topic, with physiotherapists aiming to discuss self-management approaches at  
18 preventing and dealing with flare-ups. Despite this, flare-ups remained common place, and were a  
19 cause of concern for several patients; suggesting this topic needs additional emphasis in any future  
20 training programme.  
21  
22

23  
24 *R: Did it worry you when you had those flare-ups?*  
25

26 *P1: Yeah. There were kind of back-of-your-head thoughts, like, "What if this time I have done*  
27 *it a bit too far? If it lasts a bit longer, am I going to have to go back in case I've damaged it a*  
28 *bit?" or anything like that. But most of the time, again, was two days tops. So I did have kind*  
29 *of a little niggling worry, but nothing to kind of cause me to do anything or anything like*  
30 *that. [Loaded Self-Managed]*  
31  
32

33 Both patients and physiotherapists were asked to reflect upon the intervention and their clinical  
34 response. For patients, quantitatively, the global rating of change at follow-up (measured on a 7-  
35 point Likert scale ranging from "completely recovered" to "worse than ever") was used to identify  
36 responders and non-responders. The scale was dichotomised so that responders were defined as  
37 'completely recovered' or 'strongly recovered',<sup>[5]</sup> and patients were purposively sampled to ensure  
38 that responders and non-responders were included. However, one patient (Participant 8) who  
39 received the intervention identified quantitatively as a non-responder. However, qualitatively all five  
40 patient participants interviewed from the experimental arm reported improvement and satisfaction  
41 with the loaded self-managed intervention.  
42  
43

44  
45 *"Yeah. I'm playing football again. Yeah. I'm just kind of-- sometimes I can tell I've got a little*  
46 *bit of tension there. But I'm not getting pain. It's not stopping me doing nothing at all. So*  
47 *yeah." [P9 – Loaded Self-Managed].*  
48  
49

50  
51 And this corresponded from the feedback from the treating physiotherapists, with all  
52 physiotherapists reporting favourable outcomes with the intervention.  
53  
54

55 The main emphasis of patients' and physiotherapists' narrative was the simplicity of the exercise,  
56 the loaded element of the exercise, and the self-dosage of the exercise.  
57  
58

## 59 **Theme 5: physiotherapists' development**

60

1  
2  
3 It is thought that difficulties accessing and understanding research, and professional isolation may  
4 act as barriers to implementation of research into practice.<sup>[26]</sup> Therefore, treating physiotherapists,  
5 in both the usual physiotherapy and intervention groups, were asked to reflect upon their clinical  
6 development. Particularly on beliefs around pain and exercise, and how they have developed their  
7 management approach to PFP. There was a common theme amongst all physiotherapists of clinical  
8 development over the preceding few years, with concomitant changes within their management  
9 approaches. This reflection attributed some of this development, in part, to working within a  
10 department where clinical trials were being undertaken, with exposure to contemporary thinking  
11 and practice.  
12  
13  
14

15  
16 *"I don't think I ever would have said to people, "Don't push into any pain." I think over the*  
17 *years I've probably got-- as research projects and things we've done where we're kind of*  
18 *talking more about it being okay to push into pain, I've got more relaxed with it... I think*  
19 *maybe as a junior I might have done, to be honest. So probably when I did my first rotation, I*  
20 *might have been saying more, "Very, very low," or, "It needs to be virtually pain free." But as*  
21 *the years have gone on, probably got more and more relaxed with saying it's okay, on the*  
22 *back of, I suppose, of the things that have happened in our department and changes in*  
23 *practice generally." [T1 – Usual Physiotherapy].*  
24  
25

26  
27  
28 *"I think from when I first started practice, it would have been different. So when I first*  
29 *started, I would often tape the knee, or if they came back and said that it was painful, I asked*  
30 *them to kind of back off. Almost think about off-loading the knee if it was painful. So trying*  
31 *to reduce activity if it was sore. And then I think just as I became more experienced and read*  
32 *more about that type of thing, I got more confident in not using adjunct and trying to use*  
33 *loaded exercise and reassurance about pain. So I think it fits more with my current practice,*  
34 *and I don't think it was that different. Obviously, I do a lot of pain education with back*  
35 *patients, so I think that was quite easily transferable." [T8 – Loaded Self-Managed].*  
36  
37  
38

39 Department culture has been identified in previous qualitative work as a facilitator or barrier to  
40 change, over and above research evidence and clinical guidelines,<sup>[27,28]</sup> and the physiotherapists  
41 within this study also reflected upon department culture as a driver of practice.  
42  
43

44 *"I guess in this department we're quite used to doing that sort of intervention for these*  
45 *patients, so it wasn't particularly ground-breaking to me, in a nice way [laughter]. It's your*  
46 *[the researcher's] fault." [T2 – Loaded Self-Managed].*  
47  
48

49  
50 *"Oh, it is working in a different environment as well. So when I was in \*\* I was most of the*  
51 *time by myself in a GP clinic. And you don't get a lot of interaction. That influence, when you*  
52 *actually have a bigger [department]. We talk about loading as well. So we talk about Achilles*  
53 *or tendons and we just keep talking about how everything changes and you just do your own*  
54 *research and you think, "Okay." How to make it better." [T9 – Usual Physiotherapy].*  
55  
56

57 Two physiotherapists discussed how being part of the research challenged their current practice and  
58 resulted in clinical development to both patients with and without PFP. One physiotherapist  
59  
60

1  
2  
3 conferred how the training package and personal reflection of treating study patients challenged  
4 him; the second from sparking an interest in research.  
5

6  
7 *"I think if you tell them, "Actually, how do you feel about it. You're in control," gives them the*  
8 *onus to take what they do. That's definitely changed massively. And I kind of do that with*  
9 *other patients now as well, not just the knee patients. I'm a little less strict on sets and reps.*  
10 *I'm more do what you feel you can. If you're happier, push on a little bit more."* [T3 – Loaded  
11 *Self-Managed].*

## 12 13 14 15 **Discussion**

### 16 17 **Main Findings**

18  
19 In respect to barriers and facilitators, the five major overlapping themes that emerged from the data  
20 were: (1) locus of control; (2) belief and attitude to pain; (3) treatment expectations and preference;  
21 (4) participants' engagement with the loaded self-managed exercises; and (5) physiotherapists'  
22 clinical development. Locus of control was one overarching theme that was evident throughout.  
23

24  
25 The aim of this qualitative study was to identify barriers and facilitators to the implementation of a  
26 loaded self-management exercise programme, which included education and advice on physical  
27 activity. Contrary to popular concerns relating to adherence of painful exercises,<sup>[7,8,29]</sup> all patients in  
28 the intervention group reported positive engagement. However, flare-ups from over dosing  
29 occasionally happened, with some patients expressing concern over reoccurring thoughts of 'tissue  
30 damage'; this may be relevant to all patients receiving an exercise programme. This topic needs  
31 additional emphasis in any future training programme delivered to the physiotherapists, for example  
32 with an addition of a dedicated objective in the training package, or via case-study workshops.  
33 Previous research has identified physiotherapists' negative beliefs around pain and exercise as a  
34 potential barrier to loaded exercises,<sup>[10]</sup> but this was not apparent with the physiotherapists from  
35 both groups interviewed in this study.  
36  
37  
38

39  
40 A key aspect of the loaded self-managed exercise programme is the single exercise method. Previous  
41 research with a similar approach in patients with shoulder pain identified this as a potential barrier  
42 to implementation, with physiotherapists and patients viewing this with a degree of uncertainty and  
43 scepticism.<sup>[9,10]</sup> However, contrary to this research, and despite not aligning with the  
44 physiotherapists' usual practice, both physiotherapists and patients generally viewed the single  
45 exercise approach in a positive manner. Furthermore, there was a general underlying  
46 acknowledgement of the key benefits of a single exercise approach, from both patients and  
47 physiotherapists, in terms of a time-saving approach aimed at optimising adherence, and improved  
48 dosage monitoring.  
49  
50  
51

52  
53 Locus of control is thought to predict health-related behaviours and physical activity,<sup>[30]</sup> with an  
54 important concept that it may predict healthcare utilisation.<sup>[31]</sup> Locus of control and the  
55 psychological construct of self-efficacy has overlapping meaning, where it relates to the power of  
56 thinking in achieving treatment outcomes.<sup>[18]</sup> The loaded self-managed exercise programme is  
57 designed around optimisation of self-management and self-efficacy. For example, the progressive  
58 hierarchy of exercises <sup>[19]</sup>; self-dosage of the exercise; mastery of a single exercise approach; and  
59 self-management strategies for physical activity engagement, providing the foundations for self-  
60

1  
2  
3 management of flare-ups, are intended to reduce the need for direct physiotherapy intervention. It  
4 has been shown that the lack of belief in one's own ability to manage and function despite pain is a  
5 significant predictor of which individuals with pain become disabled or depressed, with regression  
6 analysis showing that self-efficacy mediates the relationship between pain and disability.<sup>[32]</sup> Within  
7 the context of this study, patients in the intervention group described narratives that could be  
8 conceptualised as self-efficacious with greater internal locus of control, compared with patients in  
9 the usual physiotherapy group. This could be seen particularly in relation to return to physical  
10 activity; belief and attitude to pain; engagement of the intervention with self-dosage of the  
11 therapeutic exercise; and self-management.  
12  
13  
14

## 15 **Clinical and research implications**

16 Previous qualitative work has suggested that department culture is a key driver or barrier to  
17 change.<sup>[27,28]</sup> Indeed, there were clear examples of department culture within this study directly  
18 driving recent changes in physiotherapists' clinical practice. This matched previous physiotherapy  
19 qualitative work that has identified reflexion of practice and implementation of change, perhaps  
20 expeditiously, in physiotherapists who are directly engaged in research.<sup>[10]</sup> With recent research  
21 demonstrating that research active hospitals have better patient outcomes,<sup>[33]</sup> this may be  
22 considered a good thing. However, the results of this qualitative study suggest that in departments  
23 which are actively engaged with research, clinical practice may be driven by members of the  
24 research team, in lieu of definitive research results or clinical guidelines. Considering the lead  
25 researcher works in the department where the interviews were conducted, and may in part drive  
26 department culture, implementation of the intervention in other departments may be more  
27 complicated.  
28  
29  
30  
31  
32

33 Implementation fidelity refers to the degree by which the delivery of an intervention adheres to the  
34 protocol and description.<sup>[33]</sup> Physiotherapists delivering usual physiotherapy differed from the UK's  
35 usual practice, and best practice guidelines, largely with regards to the advice given on tolerable  
36 levels of pain during exercise and physical activity, and how the number and repetitions of the  
37 exercises are prescribed.<sup>[6,7]</sup> Cluster randomisation, where intervention and control participants are  
38 located at different recruitment sites, is one way of overcoming what is referred to as  
39 "contamination".<sup>[34]</sup>  
40  
41  
42

43 This research demonstrates that even though physiotherapists have certain expectations around  
44 management and exercise prescription, their approach was adaptable to the intervention with only  
45 two, two-hour training sessions; enabling patients to self-manage and make sensible decisions about  
46 their own treatment and return to physical activity. The results of this study establish a skillset  
47 needed to deliver the intervention, including: complex musculoskeletal assessment; anatomy; tissue  
48 healing and remodelling; pain biology; peripheral and central sensitisation; psychological and social  
49 factors that might affect pain perception; self-management strategies; and education skills.  
50 Currently, in the UK, these skills form part of the degree training programme for physiotherapy,  
51 further supplemented by the research training package.  
52  
53  
54

## 55 **Study limitations and strengths**

56 Two authors independently coded all transcripts, and used a clear, transparent and reproducible  
57 methodological approach to data analysis. The author's clinical and research experience lie within  
58 the biopsychosocial framework of musculoskeletal pain. It is worth noting that the interviewer made  
59  
60

1  
2  
3 it explicit to the participants that he was a physiotherapist working in the department conducting  
4 the research.  
5

6  
7 Despite efforts to the contrary, the main limitations of this study were the difficulty in interviewing  
8 patients lost to follow-up (from both treatment groups) and those classed as non-responders in the  
9 experimental intervention group. Four patients were contacted who failed to return any outcome  
10 measures, and initially agreed to be interviewed; unfortunately, they failed to attend.  
11

12  
13 The study population comprised of a single clinical setting, where the researcher was also a clinician  
14 and where clinical trials are often undertaken; it is unknown how transferable the intervention is  
15 without the relevant physiotherapy training package.  
16

17  
18 It is possible that the patient sample may differ from other samples within the UK, and how  
19 representative these findings are to other populations with PFP is unknown.  
20

## 21 22 **Conclusion**

23 This qualitative paper has identified some of the barriers and facilitators with participants  
24 (physiotherapists and patients) with the delivery of a loaded self-managed exercise programme,  
25 with education and advice on physical activity.  
26

27  
28 From the patients' perspective, facilitators to engagement included effective education around: self-  
29 management on exercise dosage; physical activity; and flare-ups. This facilitation may have been  
30 mediated, in some part, to enhancements of self-efficacy and internalised locus of control. From the  
31 physiotherapists' perspective, these results highlight the importance of 'control' and self-  
32 management during their assessment and management of patients with PFP.  
33

34  
35 In the context of the UK's usual management approach for PFP, which showed that a large  
36 proportion of practising physiotherapists would advise a patient to cease exercise or physical activity  
37 if they experience pain, implementation into general clinical practice may be challenging, but,  
38 ultimately feasible.  
39  
40  
41  
42  
43

## 44 **Authors' contributions**

45 BES was responsible for conception and design, compiling the interview schedule, interviewing,  
46 transcribing, coding, analysis and interpretation, drafting and revising the manuscript. FM was  
47 responsible for conception and design, compiling the interview schedule, coding, analysis and  
48 interpretation, drafting and revising the manuscript. PH, MB, JS, MR, TS and PL were involved in  
49 conception and design, interpretation and reviewing revisions to the manuscript. All authors have  
50 read and approved of the final manuscript.  
51  
52  
53  
54

## 55 **Funding**

56 This report is independent research arising from a Clinical Doctoral Research Fellowship, Benjamin  
57 Smith, ICA-CDRF-2015-01-002 supported by the National Institute for Health Research (NIHR) and  
58 Health Education England (HEE). The views expressed in this publication are those of the author(s)  
59  
60

1  
2  
3 and not necessarily those of the NHS, the NIHR, HEE or the Department of Health. Dr Toby Smith is  
4 supported by funding from the National Institute for Health Research (NIHR) Oxford Health  
5 Biomedical Research Centre.  
6  
7  
8

### 9 **Competing interests**

10 The authors declare that they have no competing interests.  
11  
12  
13

### 14 **Ethics approval**

15 This study was approved by the West Midlands - Black Country Research Ethics Committee  
16 (16/WM/0414) and Sponsored by Derby Teaching Hospitals NHS Foundation Trust. IRAS reference  
17 211417.  
18  
19  
20

### 21 **Availability of data**

22 Further quotations are available from Benjamin Smith at [benjamin.smith3@nhs.net](mailto:benjamin.smith3@nhs.net). No additional  
23 data available.  
24  
25  
26  
27  
28  
29  
30  
31  
32  
33  
34  
35  
36  
37  
38  
39  
40  
41  
42  
43  
44  
45  
46  
47  
48  
49  
50  
51  
52  
53  
54  
55  
56  
57  
58  
59  
60

## References

- 1 Smith BE, Selfe J, Thacker D, *et al.* Incidence and prevalence of patellofemoral pain: A systematic review and meta-analysis. *PLoS One* 2018;13(1). doi:10.1371/journal.pone.0190892
- 2 Smith BE, Moffatt F, Hendrick P, *et al.* The experience of living with patellofemoral pain—loss, confusion and fear-avoidance: a UK qualitative study. *BMJ Open* 2018;8:e018624. doi:10.1136/bmjopen-2017-018624
- 3 Maclachlan LR, Collins NJ, Matthews MLG, *et al.* The psychological features of patellofemoral pain: a systematic review. *Br J Sports Med* 2017;51:732–42. doi:10.1136/bjsports-2016-096705
- 4 Maclachlan LR, Matthews M, Hodges PW, *et al.* The psychological features of patellofemoral pain: a cross-sectional study. *Scand J Pain* 2018.
- 5 Smith BE, Hendrick P, Bateman M, *et al.* Study protocol: a mixed methods feasibility study for a loaded self-managed exercise programme for patellofemoral pain. *Pilot Feasibility Stud* 2017;4. doi:10.1186/s40814-017-0167-2
- 6 Barton CJ, Lack S, Hemmings S, *et al.* The ‘Best Practice Guide to Conservative Management of Patellofemoral Pain’: incorporating level 1 evidence with expert clinical reasoning. *Br J Sports Med* 2015;49:923–34. doi:10.1136/bjsports-2014-093637
- 7 Smith BE, Hendrick P, Bateman M, *et al.* Current Management Strategies for Patellofemoral Pain: An online survey of 99 practising UK physiotherapists. *BMC Musculoskelet Disord* 2017;18. doi:10.1186/s12891-017-1539-8
- 8 Jack K, McLean SM, Moffett JK, *et al.* Barriers to treatment adherence in physiotherapy outpatient clinics: A systematic review. *Man. Ther.* 2010;15:220–8.
- 9 Littlewood C, Malliaras P, Mawson S, *et al.* Patients with rotator cuff tendinopathy can successfully self-manage, but with certain caveats: a qualitative study. *Physiotherapy* 2014;100:80–5.
- 10 Littlewood C, Mawson S, May S, *et al.* Understanding the barriers and enablers to implementation of a self-managed exercise intervention: a qualitative study. *Physiotherapy* 2015;101:279–85.
- 11 Pope C, Ziebland S, Mays N. Analysing Qualitative Data. *Qual Res Heal Care* Published Online First: 2000. doi:10.1136/bmj.320.7227.114
- 12 Tong A, Sainsbury P, Craig J. Consolidated criteria for reporting qualitative research (COREQ): a 32-item checklist for interviews and focus groups. *Int J Qual Heal care* 2007;19:349–57.
- 13 Braun V, Clarke V. Using thematic analysis in psychology. *Qual Res Psychol* 2006;3:77–101.
- 14 Crossley KM, Stefanik JJ, Selfe J, *et al.* 2016 Patellofemoral pain consensus statement from the 4th International Patellofemoral Pain Research Retreat, Manchester. Part 1: Terminology, definitions, clinical examination, natural history, patellofemoral osteoarthritis and patient-reported outcome m. *Br J Sports Med* 2016;50:839–43.
- 15 Jones S, Hanchard N, Hamilton S, *et al.* A qualitative study of patients’ perceptions and priorities when living with primary frozen shoulder. *BMJ Open* 2013;3:e003452.



- 1  
2  
3 16 Gale NK, Heath G, Cameron E, *et al.* Using the framework method for the analysis of  
4 qualitative data in multi-disciplinary health research. *BMC Med Res Methodol* 2013;13:117.  
5  
6 17 Zimbardo PG. *Psychology and life*. Glenview, IL: Scott, Foresman 1985.  
7  
8 18 Myers AM, Powell LE, Maki BE, *et al.* Psychological indicators of balance confidence:  
9 relationship to actual and perceived abilities. *Journals Gerontol Ser A Biol Sci Med Sci*  
10 1996;51:M37–43.  
11  
12 19 Petruzzello SJ, Landers DM, Hatfield BD, *et al.* A meta-analysis on the anxiety-reducing effects  
13 of acute and chronic exercise. *Sport Med* 1991;11:143–82.  
14  
15 20 Schers H, Wensing M, Huijsmans Z, *et al.* Implementation barriers for general practice  
16 guidelines on low back pain: a qualitative study. *Spine (Phila Pa 1976)* 2001;26:E348–53.  
17  
18 21 Bernhardsson S, Larsson MEH, Johansson K, *et al.* “In the physio we trust”: A qualitative study  
19 on patients’ preferences for physiotherapy. *Physiother Theory Pract* 2017;33:535–49.  
20  
21 22 Houben RMA, Ostelo RWJG, Vlaeyen JWS, *et al.* Health care providers’ orientations towards  
22 common low back pain predict perceived harmfulness of physical activities and  
23 recommendations regarding return to normal activity. *Eur J Pain* 2005;9:173–83.  
24 doi:10.1016/j.ejpain.2004.05.002  
25  
26 23 Holden MA, Nicholls EE, Young J, *et al.* UK-based physical therapists’ attitudes and beliefs  
27 regarding exercise and knee osteoarthritis: findings from a mixed-methods study. *Arthritis*  
28 *Rheum* 2009;61:1511–21. doi:10.1002/art.24829  
29  
30 24 Darlow B, Fullen BM, Dean S, *et al.* The association between health care professional  
31 attitudes and beliefs and the attitudes and beliefs, clinical management, and outcomes of  
32 patients with low back pain: a systematic review. *Eur J Pain* 2012;16:3–17.  
33 doi:10.1016/j.ejpain.2011.06.006  
34  
35 25 Nijs J, Roussel N, Paul van Wilgen C, *et al.* Thinking beyond muscles and joints: Therapists’  
36 and patients’ attitudes and beliefs regarding chronic musculoskeletal pain are key to applying  
37 effective treatment. *Man Ther* 2013;18:96–102.  
38  
39 26 Metcalfe C, Lewin R, Wisher S, *et al.* Barriers to implementing the evidence base in four NHS  
40 therapies: dietitians, occupational therapists, physiotherapists, speech and language  
41 therapists. *Physiotherapy* 2001;87:433–41.  
42  
43 27 Gabbay J, le May A. Evidence based guidelines or collectively constructed “mindlines?”  
44 Ethnographic study of knowledge management in primary care. *Bmj* 2004;329:1013.  
45  
46 28 Lowe A, Littlewood C, McLean S. Understanding physical activity promotion in physiotherapy  
47 practice: A qualitative study. *Musculoskelet Sci Pract* 2018.  
48  
49 29 McLean SM, Burton M, Bradley L, *et al.* Interventions for enhancing adherence with  
50 physiotherapy: A systematic review. *Man Ther* 2010;15:514–21.  
51 doi:10.1016/j.math.2010.05.012  
52  
53 30 Grisolia JM, Longo A, Hutchinson G, *et al.* Applying Health Locus of Control and Latent Class  
54 Modelling to food and physical activity choices affecting CVD risk. *Soc Sci Med* 2015;132:1–  
55 10.  
56  
57 31 Mautner D, Peterson B, Cunningham A, *et al.* How Multidimensional Health Locus of Control  
58  
59  
60

- 1  
2  
3 predicts utilization of emergency and inpatient hospital services. *J Health Psychol*  
4 2017;22:314–23.  
5  
6 32 Arnstein P, Caudill M, Mandle CL, *et al.* Self efficacy as a mediator of the relationship between  
7 pain intensity, disability and depression in chronic pain patients. *Pain* 1999;80:483–91.  
8  
9 33 Ozdemir BA, Karthikesalingam A, Sinha S, *et al.* Research activity and the association with  
10 mortality. *PLoS One* 2015;10:e0118253.  
11  
12 34 Torgerson DJ. Contamination in trials: is cluster randomisation the answer? *Bmj*  
13 2001;322:355–7.  
14  
15  
16  
17  
18  
19  
20  
21  
22  
23  
24  
25  
26  
27  
28  
29  
30  
31  
32  
33  
34  
35  
36  
37  
38  
39  
40  
41  
42  
43  
44  
45  
46  
47  
48  
49  
50  
51  
52  
53  
54  
55  
56  
57  
58  
59  
60

For peer review only

## Consolidated criteria for reporting qualitative studies (COREQ): 32-item checklist

Developed from:

Tong A, Sainsbury P, Craig J. Consolidated criteria for reporting qualitative research (COREQ): a 32-item checklist for interviews and focus groups. *International Journal for Quality in Health Care*. 2007. Volume 19, Number 6: pp. 349 – 357

**YOU MUST PROVIDE A RESPONSE FOR ALL ITEMS. ENTER N/A IF NOT APPLICABLE**

| No. Item                                       | Guide questions/description                                                                                                                              | Reported on Page # |
|------------------------------------------------|----------------------------------------------------------------------------------------------------------------------------------------------------------|--------------------|
| <b>Domain 1: Research team and reflexivity</b> |                                                                                                                                                          |                    |
| <i>Personal Characteristics</i>                |                                                                                                                                                          |                    |
| 1. Interviewer/facilitator                     | Which author/s conducted the interview or focus group?                                                                                                   | Page 5             |
| 2. Credentials                                 | What were the researcher's credentials?<br>E.g. PhD, MD                                                                                                  | Page 5             |
| 3. Occupation                                  | What was their occupation at the time of the study?                                                                                                      | Page 5             |
| 4. Gender                                      | Was the researcher male or female?                                                                                                                       | Page 5             |
| 5. Experience and training                     | What experience or training did the researcher have?                                                                                                     | Page 5             |
| <i>Relationship with participants</i>          |                                                                                                                                                          |                    |
| 6. Relationship established                    | Was a relationship established prior to study commencement?                                                                                              | Page 5             |
| 7. Participant knowledge of the interviewer    | What did the participants know about the researcher? e.g. personal goals, reasons for doing the research                                                 | Page 5             |
| 8. Interviewer characteristics                 | What characteristics were reported about the interviewer/facilitator? e.g. Bias, assumptions, reasons and interests in the research topic                | Page 5 & 17        |
| <b>Domain 2: study design</b>                  |                                                                                                                                                          |                    |
| <i>Theoretical framework</i>                   |                                                                                                                                                          |                    |
| 9. Methodological orientation and Theory       | What methodological orientation was stated to underpin the study? e.g. grounded theory, discourse analysis, ethnography, phenomenology, content analysis | Page 5             |
| <i>Participant selection</i>                   |                                                                                                                                                          |                    |
| 10. Sampling                                   | How were participants selected? e.g. purposive, convenience, consecutive, snowball                                                                       | Page 5             |
| 11. Method of approach                         | How were participants approached? e.g. face-to-face, telephone, mail, email                                                                              | Page 5             |
| 12. Sample size                                | How many participants were in the study?                                                                                                                 | Page 5             |

|                                        |                                                                                                                                 |            |
|----------------------------------------|---------------------------------------------------------------------------------------------------------------------------------|------------|
| 13. Non-participation                  | How many people refused to participate or dropped out? Reasons?                                                                 | Page 17    |
| <i>Setting</i>                         |                                                                                                                                 |            |
| 14. Setting of data collection         | Where was the data collected? e.g. home, clinic, workplace                                                                      | Page 5     |
| 15. Presence of non-participants       | Was anyone else present besides the participants and researchers?                                                               | Page 5     |
| 16. Description of sample              | What are the important characteristics of the sample? e.g. demographic data, date                                               | Page 7 & 8 |
| <i>Data collection</i>                 |                                                                                                                                 |            |
| 17. Interview guide                    | Were questions, prompts, guides provided by the authors? Was it pilot tested?                                                   | Page 6     |
| 18. Repeat interviews                  | Were repeat inter views carried out? If yes, how many?                                                                          | N/A        |
| 19. Audio/visual recording             | Did the research use audio or visual recording to collect the data?                                                             | Page 6     |
| 20. Field notes                        | Were field notes made during and/or after the inter view or focus group?                                                        | Page 6     |
| 21. Duration                           | What was the duration of the inter views or focus group?                                                                        | Page 7     |
| 22. Data saturation                    | Was data saturation discussed?                                                                                                  | Page 5     |
| 23. Transcripts returned               | Were transcripts returned to participants for comment and/or correction?                                                        | No         |
| <b>Domain 3: analysis and findings</b> |                                                                                                                                 |            |
| <i>Data analysis</i>                   |                                                                                                                                 |            |
| 24. Number of data coders              | How many data coders coded the data?                                                                                            | Page 6     |
| 25. Description of the coding tree     | Did authors provide a description of the coding tree?                                                                           | N/A        |
| 26. Derivation of themes               | Were themes identified in advance or derived from the data?                                                                     | Page 6     |
| 27. Software                           | What software, if applicable, was used to manage the data?                                                                      | NVivo      |
| 28. Participant checking               | Did participants provide feedback on the findings?                                                                              | No         |
| <i>Reporting</i>                       |                                                                                                                                 |            |
| 29. Quotations presented               | Were participant quotations presented to illustrate the themes/findings? Was each quotation identified? e.g. participant number | Results    |
| 30. Data and findings consistent       | Was there consistency between the data presented and the findings?                                                              | Discussion |
| 31. Clarity of major themes            | Were major themes clearly presented in the findings?                                                                            | RESULTS    |
| 32. Clarity of minor themes            | Is there a description of diverse cases or discussion of minor themes?                                                          | Discussion |

**Once you have completed this checklist, please save a copy and upload it as part of your submission. When requested to do so as part of the upload process, please select the file type: *Checklist*. You will NOT be able to proceed with**

1  
2  
3  
4  
5  
6  
7  
8  
9  
10  
11  
12  
13  
14  
15  
16  
17  
18  
19  
20  
21  
22  
23  
24  
25  
26  
27  
28  
29  
30  
31  
32  
33  
34  
35  
36  
37  
38  
39  
40  
41  
42  
43  
44  
45  
46  
47  
48  
49  
50  
51  
52  
53  
54  
55  
56  
57  
58  
59  
60

**submission unless the checklist has been uploaded. Please DO NOT include this checklist as part of the main manuscript document. It must be uploaded as a separate file.**

For peer review only

# BMJ Open

## Barriers and facilitators of loaded self-managed exercises and physical activity in people with patellofemoral pain: understanding the feasibility of delivering a multi-centred randomised controlled trial – A UK qualitative study

|                                 |                                                                                                                                                                                                                                                                                                                                                                                                                                                                                                                                                                                                                                                                                                                                                                                                 |
|---------------------------------|-------------------------------------------------------------------------------------------------------------------------------------------------------------------------------------------------------------------------------------------------------------------------------------------------------------------------------------------------------------------------------------------------------------------------------------------------------------------------------------------------------------------------------------------------------------------------------------------------------------------------------------------------------------------------------------------------------------------------------------------------------------------------------------------------|
| Journal:                        | <i>BMJ Open</i>                                                                                                                                                                                                                                                                                                                                                                                                                                                                                                                                                                                                                                                                                                                                                                                 |
| Manuscript ID                   | bmjopen-2018-023805.R2                                                                                                                                                                                                                                                                                                                                                                                                                                                                                                                                                                                                                                                                                                                                                                          |
| Article Type:                   | Research                                                                                                                                                                                                                                                                                                                                                                                                                                                                                                                                                                                                                                                                                                                                                                                        |
| Date Submitted by the Author:   | 17-Apr-2019                                                                                                                                                                                                                                                                                                                                                                                                                                                                                                                                                                                                                                                                                                                                                                                     |
| Complete List of Authors:       | Smith, Benjamin; University Hospitals of Derby and Burton NHS Foundation Trust; University of Nottingham<br>Moffatt, Fiona; University of Nottingham<br>Hendrick, Paul ; University of Nottingham<br>Bateman, Marcus; University Hospitals of Derby and Burton NHS Foundation Trust<br>Selfe, James; Manchester Metropolitan University, Department of Health Professions<br>Rathleff, Michael ; Department of Clinical Medicine at Aalborg University, Research Unit for General Practice in Aalborg; Aalborg University Hospital, Department of Occupational Therapy and Physiotherapy, Department of Clinical Medicine<br>Smith, Toby O.; University of Oxford , Nuffield Department of Orthopaedics, Rheumatology and Musculoskeletal Sciences<br>Logan, Phillipa; University of Nottingham |
| <b>Primary Subject Heading</b>: | Qualitative research                                                                                                                                                                                                                                                                                                                                                                                                                                                                                                                                                                                                                                                                                                                                                                            |
| Secondary Subject Heading:      | Sports and exercise medicine                                                                                                                                                                                                                                                                                                                                                                                                                                                                                                                                                                                                                                                                                                                                                                    |
| Keywords:                       | patellofemoral pain, PFP, QUALITATIVE RESEARCH, REHABILITATION MEDICINE                                                                                                                                                                                                                                                                                                                                                                                                                                                                                                                                                                                                                                                                                                                         |
|                                 |                                                                                                                                                                                                                                                                                                                                                                                                                                                                                                                                                                                                                                                                                                                                                                                                 |

SCHOLARONE™  
Manuscripts

1  
2  
3  
4  
5  
6  
7  
8  
9

## **Barriers and facilitators of loaded self-managed exercises and physical activity in people with patellofemoral pain: understanding the feasibility of delivering a multi-centred randomised controlled trial – A UK qualitative study**

10 Benjamin E Smith<sup>1,2,\*</sup>, Fiona Moffatt<sup>3</sup>, Paul Hendrick<sup>3</sup>, Marcus Bateman<sup>1</sup>, James Selfe<sup>4</sup>, Michael Skovdal Rathleff<sup>5,6</sup>, Toby O Smith<sup>7</sup>, Phillipa Logan<sup>2</sup>

11  
12  
13  
14  
15  
16  
17  
18  
19

<sup>1</sup>University Hospitals of Derby and Burton NHS Foundation Trust, Physiotherapy Department (Level 3), London Road Community Hospital, Derby DE1 2QY, UK

20  
21  
22

<sup>2</sup>Division of Rehabilitation and Ageing, School of Medicine, University of Nottingham, Nottingham, UK

23  
24  
25

<sup>3</sup>Division of Physiotherapy and Rehabilitation Sciences, School of Health Sciences, University of Nottingham, Nottingham University Hospitals (City Campus), Nottingham, UK.

26  
27  
28

<sup>4</sup>Department of Health Professions, Manchester Metropolitan University, Manchester, UK

29  
30  
31

<sup>5</sup>Research Unit for General Practice in Aalborg, Department of Clinical Medicine at Aalborg University, Aalborg, Denmark

32  
33  
34

<sup>6</sup>Department of Occupational Therapy and Physiotherapy, Department of Clinical Medicine, Aalborg University Hospital, Denmark

35  
36  
37

<sup>7</sup>Nuffield Department of Orthopaedics, Rheumatology and Musculoskeletal Sciences, University of Oxford, UK

38  
39  
40  
41  
42  
43  
44  
45  
46  
47  
48  
49  
50  
51  
52  
53  
54  
55  
56  
57  
58  
59  
60

\*Corresponding author. Tel: 01332 254631 Email: [benjamin.smith3@nhs.net](mailto:benjamin.smith3@nhs.net)

## Abstract

### Objectives:

There is an emergent body of evidence supporting exercise therapy and physical activity in the management of musculoskeletal pain. The purpose of this study was to explore potential barriers and facilitators with patients and physiotherapists with patellofemoral pain involved in a feasibility randomised controlled trial (RCT) study. The trial investigated a loaded self-managed exercise intervention, which included education and advice on physical activity versus usual physiotherapy as the control.

### Design:

Qualitative study, embedded within a mixed-methods design, using semi-structured interviews.

### Setting:

A UK National Health Service physiotherapy clinic in a large teaching hospital.

### Participants:

Purposively sampled 20 participants within a feasibility RCT study; 10 patients with a diagnosis of patellofemoral pain, aged between 18 and 40, and 10 physiotherapists delivering the interventions.

### Results:

In respect to barriers and facilitators, the five overlapping themes that emerged from the data were: (1) locus of control; (2) belief and attitude to pain; (3) treatment expectations and preference; (4) participants' engagement with the loaded self-managed exercises; and (5) physiotherapists' clinical development. Locus of control was one overarching theme that was evident throughout.

Contrary to popular concerns relating to painful exercises, all participants in the intervention group reported positive engagement. Both physiotherapists and patients, in the intervention group, viewed the single exercise approach in a positive manner. Participants within the intervention group described narratives demonstrating self-efficacy, with greater internal locus of control compared to those who received usual physiotherapy, particularly in relation to physical activity.

### Conclusions:

Implementation, delivery and evaluation of the intervention in clinical settings may be challenging, but feasible with the appropriate training for physiotherapists.

Participants' improvements in pain and function may have been mediated, in some part, by greater self-efficacy and locus of control.

### Trial registration:

ISRCTN 35272486



## Article Summary

### Strengths and limitations of this study:

- This paper identified, through interviews, key barriers and facilitators to implementation of a loaded self-managed exercise programme, with education and advice on physical activity.
- Two authors independently coded all transcripts, and a clear, transparent and reproducible methodological approach was used in the analysis.
- The main limitations of this study were the difficulty in interviewing patients lost to follow-up (from both groups) and finding patients classed as 'non-responders' in the loaded self-managed group.
- The study population comprised of a single clinical setting, where the researcher was also a clinician.

Word Count: 6,530

For peer review only

## Introduction

Patellofemoral pain (PFP) is one of the most common forms of knee pain in adults under the age of 40 years, with an estimated prevalence of 23% in the general population.<sup>[1]</sup> Many individuals with PFP develop associated pain-related fear, such as fear-avoidance and catastrophising thoughts in relation to their knee pain.<sup>[2-4]</sup>

This research was undertaken within a framework of mixed-methods, embedded within a feasibility study comparing a loaded self-managed exercise protocol with usual physiotherapy for people with PFP.<sup>[5]</sup> The loaded self-managed exercise programme is a novel intervention based on pain science (where a single exercise is designed to load and temporarily aggravate patients' symptoms), self-management strategies and improvements in physical activity levels.<sup>[5]</sup> Usual physiotherapy can be described as a mixed packaged (multi-model) approach of 'trial-and-error' exercises, patellar taping and bracing, and foot orthoses. It is typically aimed at reducing the load on the patella, with avoidance of painful exercise.<sup>[6,7]</sup>

The loaded self-managed exercise programme does not align with current UK physiotherapists' preferred treatment approach for PFP.<sup>[7]</sup> Protocols that use loaded exercises are typically painful to perform,<sup>[5]</sup> though increased pain levels during exercise is often cited as a strong predictor of poor adherence.<sup>[8]</sup> Secondly, pain education and increasing physical activity require a certain level of self-management and personal responsibility on the part of the patient, also strong predictors of poor exercise adherence.<sup>[8]</sup> And thirdly, a key aspect of the loaded self-managed exercise programme is the single exercise method, which physiotherapists and patients historically viewed with a degree of scepticism, when used in treating shoulder pain.<sup>[9,10]</sup>

Therefore, this qualitative investigation aimed to explore potential barriers and facilitators to implementation of the intervention with participants with PFP involved in a feasibility randomised controlled trial (RCT),<sup>[5]</sup> with acknowledgment that qualitative inquiry can provide an insight that may lead to development of ideas and hypothesis generation.

## Method

A qualitative study was conducted embedded within a mixed-methods feasibility study. To avoid cross-contamination between the two groups the intervention group was treated by different qualified physiotherapists, who received the intervention training package, to the usual physiotherapy group. To fully explore the aims of this study patients and physiotherapists receiving and delivering both the intervention and usual physiotherapy were interviewed.<sup>[5]</sup> The framework approach was the most appropriate method for inquiry, as the objectives of the investigation were set *a priori*.<sup>[11]</sup>

This study has been reported in line with the COnsolidated criteria for REporting Qualitative research (COREQ) checklist.<sup>[12]</sup>

This study did not set out to prove or disprove a hypothesis, it set out to generate new data from which an understanding of barriers and facilitators to the intervention and study design might be developed. The authors took an epistemological position described as “contextualist” by Braun and Clarke that sits central on the spectrum of realism and constructivism.<sup>[13]</sup> It recognises the experience at an individual level, whilst considering the wider context within a sociocultural perspective. Through this, the beliefs and perceptions of a person, with any meanings attached, can be explored, whilst considering social and cultural factors. This position has previously been discussed in detail in relation to this mixed-methods study.<sup>[2]</sup>

## Participants

A purposive sample of ten patients with PFP were recruited from the 60 patients who were recruited to a feasibility study, this included patients in the intervention group and those receiving usual physiotherapy. International consensus has defined PFP symptoms as typically developing insidiously with retropatellar pain or diffuse peripatellar pain, aggravated by activities that “load the joint”, such as climbing and descending stairs, squatting, running or jumping.<sup>[14]</sup> Based on similar studies, we anticipated this sample size would be sufficient to reach data saturation.<sup>[9,10]</sup> Patients were selected based on representation of a spectrum of population in terms of: intervention delivered (both the intervention, and usual physiotherapy), age, gender, return of outcome forms, and clinical outcome, as determined by a global rating of change at follow-up measured on a 7-point Likert scale ranging from “completely recovered” to “worse than ever”.<sup>[5]</sup> Clinical responders were defined as “completely recovered” or “strongly recovered”.<sup>[5]</sup> Attempts were made to interview those lost to follow up and non-responders in both groups.

Initial recruitment to the feasibility study included gaining written consent for taking part in future qualitative investigations with consent to audio-recording and to publication of anonymised quotations. Participants were initially followed up by a telephone call. If they agreed, a convenient time was arranged to complete an interview. Participants were given the opportunity to discuss any concerns before the interviews started.

Ten physiotherapists were purposively sampled, this included those delivering the intervention and those delivering usual physiotherapy. Based on similar studies, we anticipated this sample size would be sufficient to reach data saturation.<sup>[9,10]</sup> Again, physiotherapists were selected based on characteristic to represent a spectrum population in terms of: intervention delivered, age, sex and length of time qualified. The physiotherapists initially agreed to take part in the research when briefed during the study intervention training sessions. They were subsequently approached about the

1  
2  
3 qualitative component of the study via team meetings. Participants were given the opportunity to  
4 read the participant information sheet and to ask any questions before the consent form was signed.  
5

## 6 **Recruitment**

7  
8 All participants were interviewed at a convenient time in the hospital-based physiotherapy  
9 department. The researcher (BES) introduced himself as a physiotherapist working in that  
10 department, and as a researcher conducting a PhD. The researcher explained the aims of the study.  
11 Verbal consent was taken to start recording.  
12  
13

## 14 **Data Collection**

15 Semi-structured interviews were designed by the researchers (BES and FM) using topic guidelines with  
16 prompts to explore barriers and facilitators to taking part in a loaded self-managed exercise  
17 intervention. Patients from both treatment groups were asked about response to treatment, belief  
18 and attitude to pain, belief and attitude to physical activity, treatment expectations and protocol  
19 parameters. Only those in the intervention group were asked about their engagement with the loaded  
20 self-managed intervention. All physiotherapists were asked about their usual practice, personal  
21 development, belief and attitude to pain, belief and attitude to physical activity and protocol  
22 parameters. Only those delivering the intervention were asked about their engagement with the  
23 loaded self-managed intervention, including the training package. The interviews ranged from five to  
24 21 minutes (mean time: 11 minutes) in duration.  
25  
26  
27  
28

29 The interview guide was not piloted, however the researcher maintained a reflective journal, noting  
30 down initial thoughts and ideas after each interview.<sup>[15]</sup> This identified that the first two interviews  
31 raised matters relating to responsibility and locus of control around return to physical activity. This  
32 was incorporated into subsequent interview schedules for both patients and physiotherapists.  
33  
34

## 35 **Data Analysis**

36 All audio files were collected and transcribed verbatim.  
37  
38

39 The data were analysed using a thematic Framework Method,<sup>[11]</sup> which was the most appropriate  
40 method for inquiry, as the objectives of the investigation were set *a priori*.<sup>[11]</sup> Furthermore, data  
41 analysis can be conducted systematically, allowing the data to be explored in depth while  
42 simultaneously maintaining an effective and transparent audit trail.<sup>[11]</sup> During transcription, initial  
43 thoughts and ideas were noted in the reflective journal. Audio files were listened to several times to  
44 check for accuracy, and transcriptions were read and re-read a number of times; this data  
45 familiarisation further informed the development of a thematic framework. Following familiarisation,  
46 both authors agreed on the initial thematic framework. Data coding then identified and coded  
47 pertinent features of the data giving equal priority over the whole dataset. These steps were  
48 independently conducted by two researchers (BES & FM) who met to compare codes. This formed a  
49 working analytical framework upon which the data were examined. The transcripts were then indexed  
50 using the categories and codes on the working framework. During this process, the data were  
51 organised according to the defined thematic framework. Charting was then used to summarise and  
52 display the data by category and theme for each transcript.<sup>[11,16]</sup> Indexing was initiated by one  
53 researcher (BES), prior to charting, and subsequently developed and verified by a second researcher  
54 (FM).  
55  
56  
57  
58  
59  
60

Data were organised and analysed using QSR International's NVivo 11. After 10 interviews per group, it was determined by the researchers that data saturation had occurred as no new thoughts or concepts were generated in the later interviews.

## Patient and Public Involvement

This research project has been driven by the views of people suffering from PFP. Patients were consulted for their views, including patient members of the Steering Group Committee. Thoughts and preferences to current programmes of therapy and treatment were requested, and these views have been incorporated into the planning, design, application and dissemination of this study.

## Results

The 10 patients included three men and seven women, aged between 26 to 37 years (mean: 30.6 years), with a diagnosis of PFP for a mean duration of 25 months (range: 3 months to 10 years). The 10 physiotherapists included two men and eight women, aged between 24 to 58 years (mean: age 39.4 years), with a mean of 16 years qualified (range: 3 years to 37 years). Full patient and physiotherapist characteristics are presented in Table 1 and Table 2 respectively.

**Table 1 Characteristics of patients**

| Participant Number | Gender | Intervention Received  | Clinical Responder |
|--------------------|--------|------------------------|--------------------|
| P1                 | M      | Intervention           | Responder          |
| P2                 | M      | Usual<br>Physiotherapy | Non-<br>responder  |
| P3                 | F      | Usual<br>Physiotherapy | Non-<br>responder  |
| P4                 | F      | Usual<br>Physiotherapy | Responder          |
| P5                 | F      | Intervention           | Responder          |
| P6                 | F      | Usual<br>Physiotherapy | Non-<br>responder  |
| P7                 | F      | Usual<br>Physiotherapy | Responder          |
| P8                 | F      | Intervention           | Non-<br>responder  |
| P9                 | M      | Intervention           | Responder          |
| P10                | F      | Intervention           | Responder          |

F, female; M, male

**Table 2 Characteristics of physiotherapists**

| Therapist Number | Gender | Intervention Delivered |
|------------------|--------|------------------------|
| T1               | F      | Usual Physiotherapy    |
| T2               | F      | Intervention           |
| T3               | M      | Intervention           |
| T4               | F      | Intervention           |
| T5               | F      | Usual Physiotherapy    |
| T6               | F      | Usual Physiotherapy    |
| T7               | F      | Intervention           |
| T8               | M      | Intervention           |
| T9               | F      | Usual Physiotherapy    |
| T10              | F      | Usual Physiotherapy    |

F, female; M, male

In respect to barriers and facilitators, the five major overlapping themes that emerged from the data were: (1) locus of control; (2) belief and attitude to pain; (3) treatment expectations and preference; (4) participants' engagement with the loaded self-managed exercises; and (5) physiotherapists' clinical development. Locus of control was one overarching theme that was evident throughout. The findings are presented in relation to existing literature.

### Theme 1: locus of control

Locus of control is a psychological construct about the degree people believe they have control over their actions and outcomes.<sup>[17]</sup> A key feature of the intervention being evaluated in the RCT, is the self-dosing of exercise, based on the symptomatic response, and the self-managed approach to physical activity. This could be conceptualised as internalising locus of control with the patient, and is thought to predict treatment compliance, acting as a barrier or facilitator to implementation.<sup>[8]</sup> Patients within the intervention group described narratives that could be conceptualised as greater internal locus of control, compared with patients in the usual physiotherapy group.

*R: And how did you feel about being in charge of that [the exercise]?*

*P8: Yeah. I think it was empowering in a way. [Loaded Self-Managed]*

Early interviews raised matters relating to whose authority it was to give the 'permission' to return to, or increase, physical activity; including when and how this should be done. Again, clear differences between usual physiotherapy and the intervention could be seen, particularly in relation to physiotherapists' management approach to physical activity.

1  
2  
3 *“Ultimately up to the patient really. They should feel in charge of what they do. They need to*  
4 *have control of the situation. If they're just waiting for somebody else to dictate that, then they*  
5 *haven't got very good control. But they might need some encouragement or reassurance that*  
6 *it's okay to actually, if you want to get back to these activities you can. You don't need to ask*  
7 *me permission really.” [T2 – Loaded Self-Managed].*  
8  
9

---

10  
11  
12 *I would usually kind of bat it back to them and say, "Well, what do you think you can do?" And*  
13 *using the same principles as with the exercises, if you're getting some discomfort at the time,*  
14 *it doesn't mean to say you then stop. And just see how it is afterwards, and then modify how*  
15 *much you're doing in response to how much pain you're experiencing afterwards. [T4 – Loaded*  
16 *Self-Managed].*  
17  
18

19 Contrasting the push for an internal locus of control with the intervention was a narrative discussed  
20 by some patients receiving usual physiotherapy. For example, Participant 4 had indicated she was  
21 ‘strongly recovered’, had minimal pain and had returned to almost all of her usual activity. However,  
22 she had not returned to the gym yet, and had booked a follow-up appointment with the treating  
23 physiotherapist for after the interviews where she hoped to receive the ‘go-ahead’ to return.  
24  
25

26 And this patient narrative was reinforced by the treating physiotherapists’ understanding of their role:  
27  
28

29 *“I'd assess them functionally. So you kind of break down that hobby or that activity into*  
30 *sections. So if it's a sport, look at part of it... and if you can't do two or three of them, it's not*  
31 *just your knee that's letting you down. Generally, you're not quite ready for that.” [T10 – Usual*  
32 *Physiotherapy].*  
33  
34

35 A few of the physiotherapists within the usual physiotherapy group viewed their role more of a  
36 partnership with the patient, where decisions about return to activity were agreed mutually.  
37

38 *“Well, it'd be a mutual thing. A lot of them weren't sporty, but they would ask and we discussed*  
39 *the suitability.” [T5 – Usual Physiotherapy].*  
40  
41

42  
43 Locus of control is interrelated to the psychological construct of self-efficacy, where it relates to the  
44 power of thinking in achieving treatment outcomes.<sup>[18]</sup> The loaded self-managed exercise programme  
45 is designed around optimisation of self-management and self-efficacy. For example, the progressive  
46 hierarchy of the exercise demonstrates and provides evidence to the patient that they are  
47 systematically approaching their clinical and personal goals.<sup>[19]</sup> Some patients within the intervention  
48 group expressed views that could be contextualised as self-efficacious in line with this hierarchy.  
49  
50

51 *“That sense of just you know how much progress you made. A week ago you did 20, and now*  
52 *you did 30 or 40.” [P9 – Loaded Self-Managed].*  
53  
54

---

55  
56 *“When I hit the target and I then thought, "Oh, I can actually do a few more," and it's*  
57 *comfortable to do, I did do that.” P5 – Loaded Self-Managed].*  
58  
59  
60

## Theme 2: treatment expectations and preference

Previous qualitative work has identified unmet treatment expectation as a potential barrier to treatment adherence,<sup>[20,21]</sup> therefore all patients were asked to reflect upon their expectations, with physiotherapists invited to discuss their usual practice. The predominant patient expectation was that they would receive some form of exercise programme from their physiotherapy, and that this would probably involve some level of pain.

A small number of patients discussed an expectation of hands-on passive treatment.

*"I was more expecting sort of a hands-on approach, more like physio massage when I came."  
[P8 – Loaded Self-Managed].*

Furthermore, in keeping with themes found in other PFP qualitative work,<sup>[2]</sup> several patients established a clear wish for questions to be answered, in relation to causative factors around their pain:

*"For me, I wanted answers on why my knee was painful. Because I think, going back 10 years ago, when I first went to my doctor's, I was told it was ligament damage. And it didn't clear up, and when I went back, it was like, "Well, the waiting list for physio is so long, by the time you get there, you'll be recovered." And then, when I went back again, it was like, "Well, you're too young to have steroid injections." And then, I just always felt I was like, in a sense, sent packing without any answers. And then, I wanted some answers as to why it's hurting so I could understand it." [P10 – Loaded Self-Managed Group]*

Previous qualitative work in patients with PFP found a dominant negative view of physiotherapy,<sup>[2]</sup> with one patient similarly expressing an initial negative view of seeing a physiotherapist.

*"The physio-- I don't know, I was a bit sceptical, to be honest. But yeah, it has given me the result I wanted." [P10 – Loaded Self-Managed].*

All physiotherapists reported that their current practice and preference for treating PFP included an exercise programme. However, in contrast to the majority of UK physiotherapists,<sup>[7]</sup> they all reported an expectation that exercises would be performed with a degree of pain. Though there remained a large amount of heterogeneity in terms of language choice, and what parameters were used, when discussing optimal exercise dosage with patients.

*"But if you think about a VAS or something like that ... probably you wouldn't want your pain to be greater than maybe a 3 or a 4 out of 10." [T1 – Usual Physiotherapy].*

---

*"Quite oftentimes I tell people to do reps to kind of fatigue, but not to pain. So people are getting a bit of a niggles, if they can manage it, and they can bring the pain level back down quite quickly afterwards. So if they can do exercises, it aggravates it, but within about a half an hour symptoms have settled, then that's fine." [T10 – Usual Physiotherapy].*



1  
2  
3 Dissonance between the single exercise approach used in the intervention and treating  
4 physiotherapists' preference was evident. The single exercise approach was not favoured by any of  
5 the physiotherapists interviewed:  
6

7  
8 *"I think possibly the intervention was simpler to do in the fact that it was geared, sort of guided*  
9 *around one exercise. And probably, what I would have done before is perhaps give more*  
10 *exercises and chop and change them maybe a bit more frequently."* [T7 – Loaded Self-  
11 *Managed].*  
12

13  
14 Additionally, some physiotherapists were very prescriptive with their exercise dosage.

15  
16 *"Initially I might start with them with 15 repetitions and work to three sets, two-minute break*  
17 *in between".* [T9 – Usual Physiotherapy].  
18

19  
20 Again, in contrast to the majority of UK physiotherapists,<sup>[7]</sup> and similarly to the experimental  
21 intervention, many of the physiotherapists interviewed in this study (from both groups) would try to  
22 encourage the patient to self-dose their exercise:  
23

24  
25 *"I'm a little less strict on sets and reps. I'm more do what you feel you can. If you're happier,*  
26 *push on a little bit more."* [T3 – Loaded Self-Managed].  
27

28 As identified above, most patients were content with the anticipation that exercises would be painful,  
29 and indeed this matched current clinical practice with the physiotherapists interviewed, despite not  
30 aligning with UK wide current practice.<sup>[7]</sup> Where departmental practice did align itself more with UK  
31 practice, was with regards to the number of exercises prescribed, in clear contrast to the single  
32 exercise approach with the intervention.  
33

### 34 35 **Theme 3: belief and attitude to pain**

36  
37 Interlinked to the all themes, particularly locus of control were patients' and physiotherapists' beliefs  
38 and attitudes to pain. There is a growing body of evidence suggesting that health practitioners with a  
39 biomedical orientation to pain are more likely to advise patients to limit their physical activity due to  
40 pain <sup>[22-24]</sup>; and consequently may induce fear-avoidant behaviours onto their patients,<sup>[24,25]</sup> acting as  
41 a clear barrier to implementation. There were examples in the usual physiotherapy group of  
42 biomedical models of diagnosis and management with misconceptions of 'tissue damage':  
43

44  
45 *"She [the physiotherapist] gave me exercises to do. I've always been keen on the gym. I go to*  
46 *the gym. I was a doing a lot of the stuff she's asking me to do, anyway. Or it's probably more*  
47 *about my technique. I was maybe not doing it as well as I could have done. So I fell back. ...So*  
48 *she referred me for scans on both knees-- well, referred me back to my doctor. My doctor*  
49 *referred me to an orthopaedist. They referred me for a scan on both knees. The MRI scan*  
50 *showed this knee's absolutely fine - which it's not."* [P3 – Usual Physiotherapy].  
51  
52  
53

54  
55 *R: So if they're not achieving that, would you advise them not to run then?*

56  
57 *P10: Probably. Yes. I'd probably have a look at them, and if they were really antalgic on their*  
58 *gait, then yeah, tell them not to bother, to work on their weaknesses, and then reassess it a*  
59  
60

1  
2  
3 *bit later down the line. Because otherwise, they might just end up making their knee 10 times*  
4 *worse because they're running on a weakened, less-controlled knee. [Usual Physiotherapy]*  
5  
6

7 Of interest is that the physiotherapist delivering the usual physiotherapy, as described in theme 2, did  
8 describe treatment preference not fully aligned with the majority of UK physiotherapists,<sup>[7]</sup> and the  
9 best practice guidelines,<sup>[6]</sup> in as much as they expressed a belief that pain is acceptable during exercise.  
10 Certainly, this did identify some fidelity and contamination concerns with regards to usual  
11 physiotherapy:  
12

13  
14 *"I think it was sometimes a bit hard to stick to usual physio, because we still keep reading. We*  
15 *try to keep up with what's happening... So it's just a bit of reading and then I change 'usual*  
16 *physio', it keeps developing as you work." [T9 – Usual Physiotherapy].*  
17  
18

19 Yet despite this, there was marked differences in the patients' and physiotherapists' beliefs and  
20 attitudes to pain in the intervention group, compared with usual physiotherapy, demonstrating some  
21 re-conceptualisation of pain. This suggests the training programme did improve contemporary  
22 knowledge of pain science.  
23

24  
25 *"Yeah, the pain wasn't excruciating or anything. At no point did I think, "I can't keep doing*  
26 *this." It was a fairly normal level, I'd say. It wasn't anything that would make me come back,*  
27 *and say, "I'm worried that I'm doing something wrong," or anything like that. It was fairly*  
28 *normal. I wouldn't say it was too bad." [P1 – Loaded Self-Managed].*  
29  
30

---

31  
32 *P7: The physiotherapist said to go ahead and run if it wasn't going to do any damage. Yes, if*  
33 *it's painful, stop. [Usual Physiotherapy]*  
34  
35

---

36  
37 *"My own thoughts have been, I think, changed definitely with this intervention. I think exercise*  
38 *is-- I've always said to patients that if it's painful, they can still carry on. But again, like I said,*  
39 *I gave that arbitrary figure. If it goes above this, then maybe taper down... But actually, maybe*  
40 *educating them and telling them, "Pain isn't an indicator of damage. You can push through*  
41 *into it a little bit, but it just has to be something that you're comfortable with." And I think the*  
42 *thing that changed with me saying that to patients was I am not the one that's going to dictate*  
43 *that. You're the one has to go through this." [T3 – Loaded Self-Managed].*  
44  
45

46 There was one example of mixed messages from the patient, with regards to acceptable and  
47 appropriate levels of pain during exercise and physical activity. This may suggest the heterogeneity in  
48 physiotherapy advice, as previously discussed in the second theme with physiotherapists, may have a  
49 negative effect with increasing levels of uncertainty. This is in keeping with previous research  
50 suggesting an iatrogenic effect with physiotherapy treatment for PFP relating to diagnosis uncertainty  
51 and fear-avoidance behaviour.<sup>[2]</sup>  
52  
53

54  
55 *"He [the physiotherapist] recommend that I didn't run, which is probably the only thing I don't*  
56 *do now. I think it was the impact. Like, my knee with my cartilage. That's why he didn't*  
57 *recommend it at that point." [P10 – Loaded Self-Managed].*  
58  
59  
60

## Theme 4: participants' engagement with the loaded self-managed exercises

Only patients and physiotherapists receiving or delivering the intervention were asked to discuss their thoughts about it. Both patients and physiotherapists reported several different ways in which they interacted and connected with the intervention. Firstly, the intervention laid the foundation of re-conceptualisation of pain-related fear where the physiotherapist spent a period of time educating the patient about pain mechanisms.<sup>[5]</sup> Descriptions of tissue-based pathology models of pain, e.g. patellar mal-tracking, or limb mal-alignment were actively discouraged and challenged by the physiotherapist. The aim was for the patient to gain an evidenced-based understanding of dysfunctional central nociceptive processing as an explanation of chronic and persistent pain and the role and impact of fear.

*"Once you'd explained-- all the key is in the explanation about pain and how pain works and explaining why they're doing it from that. And in fact, sort of the particular girl I'm thinking about, she'd stopped going downstairs because of the pain. When I reviewed her last time, she said, "Well, I haven't been avoiding the stairs." [with no increase in pain levels] So it's good stuff." [T7 – Loaded Self-Managed].*

Other critical aspects of the intervention discussed by the participants were the self-dosage of the exercise, based upon the symptomatic response, rather than being prescribed by the physiotherapist. These aspects were all discussed positively, with no negative features identified.

*"I think for me I've got results a lot quicker, so because I was kind of going through the pain with all that. And I definitely stuck with the exercise more, because when I first started with one exercise I might get a bit bored. But I've definitely stuck to it more." [P9 – Loaded Self-Managed]*

The simplicity of a single exercise approach was discussed by all the interviewees, predominantly in a positive manner.

*"So I think it's quite simple, so if I do ever get-- the problem starts to occur again, it's no real problem to just start." [P1 – Loaded Self-Managed].*

However, one physiotherapist admitted to being initially sceptical that one exercise would be enough.

*"And using that single exercise as that treatment. So in terms of my thoughts before, would that be enough for my patients? And the ones I've seen, have seemingly done well with just one exercise, rather than having four or five different exercises to do." [T3 – Loaded Self-Managed].*

The key feature of patients self-dosing their exercise, based on the symptomatic response, is an understanding of when and how to progress or regress the exercise. Patients recognised the role of 'trial and error' in this process, and the relevance of the pain education prior to the exercise programme being implemented.

*"I do remember, initially, there being kind of a week or two, maybe, where I was kind of finding kind of the right amount [of the exercise to do]." [P9 – Loaded Self-Managed].*

1  
2  
3  
4  
5  
6  
7  
8  
9  
10  
11  
12  
*"I think what you tend to do as physios, we very often tend to be quite prescriptive. And patients do ask that. They want to know how many they should do, how many times a day, whereas this is actually giving them much more their own power of making them decide what they're going to do. So actually, hopefully, then they're going to carry on with it in the future."*  
[T7 – Loaded Self-Managed].

13  
14  
15  
16  
17  
18  
19  
20  
21  
22  
23  
24  
25  
26  
27  
28  
29  
30  
31  
32  
33  
34  
35  
36  
37  
38  
39  
40  
41  
42  
43  
44  
45  
46  
47  
48  
49  
50  
51  
52  
53  
54  
55  
56  
57  
58  
59  
60  
Interlinked to self-dosing was the expected pain flare-ups, when patients over dosed their exercise or physical activity. The physiotherapists' training programme at the start of the feasibility study covered this topic, with physiotherapists aiming to discuss self-management approaches at preventing and dealing with flare-ups. Despite this, flare-ups remained common place, and were a cause of concern for several patients; suggesting this topic needs additional emphasis in any future training programme.

*R: Did it worry you when you had those flare-ups?*

*P1: Yeah. There were kind of back-of-your-head thoughts, like, "What if this time I have done it a bit too far? If it lasts a bit longer, am I going to have to go back in case I've damaged it a bit?" or anything like that. But most of the time, again, was two days tops. So I did have kind of a little niggling worry, but nothing to kind of cause me to do anything or anything like that.*  
[Loaded Self-Managed]

Both patients and physiotherapists were asked to reflect upon the intervention and their clinical response. For patients, quantitatively, the global rating of change at follow-up (measured on a 7-point Likert scale ranging from "completely recovered" to "worse than ever") was used to identify responders and non-responders. The scale was dichotomised so that responders were defined as 'completely recovered' or 'strongly recovered',<sup>[5]</sup> and patients were purposively sampled to ensure that responders and non-responders were included. However, one patient (Participant 8) who received the intervention identified quantitatively as a non-responder. However, qualitatively all five patient participants interviewed from the experimental arm reported improvement and satisfaction with the loaded self-managed intervention.

*"Yeah. I'm playing football again. Yeah. I'm just kind of-- sometimes I can tell I've got a little bit of tension there. But I'm not getting pain. It's not stopping me doing nothing at all. So yeah."*  
[P9 – Loaded Self-Managed].

And this corresponded from the feedback from the treating physiotherapists, with all physiotherapists reporting favourable outcomes with the intervention.

The main emphasis of patients' and physiotherapists' narrative was the simplicity of the exercise, the loaded element of the exercise, and the self-dosage of the exercise.

## Theme 5: physiotherapists' development

It is thought that difficulties accessing and understanding research, and professional isolation may act as barriers to implementation of research into practice.<sup>[26]</sup> Therefore, treating physiotherapists, in both the usual physiotherapy and intervention groups, were asked to reflect upon their clinical

1  
2  
3 development. Particularly on beliefs around pain and exercise, and how they have developed their  
4 management approach to PFP. There was a common theme amongst all physiotherapists of clinical  
5 development over the preceding few years, with concomitant changes within their management  
6 approaches. This reflection attributed some of this development, in part, to working within a  
7 department where clinical trials were being undertaken, with exposure to contemporary thinking and  
8 practice.  
9  
10

11  
12 *"I don't think I ever would have said to people, "Don't push into any pain." I think over the*  
13 *years I've probably got-- as research projects and things we've done where we're kind of*  
14 *talking more about it being okay to push into pain, I've got more relaxed with it... I think maybe*  
15 *as a junior I might have done, to be honest. So probably when I did my first rotation, I might*  
16 *have been saying more, "Very, very low," or, "It needs to be virtually pain free." But as the*  
17 *years have gone on, probably got more and more relaxed with saying it's okay, on the back of,*  
18 *I suppose, of the things that have happened in our department and changes in practice*  
19 *generally." [T1 – Usual Physiotherapy].*  
20  
21  
22

23  
24 *"I think from when I first started practice, it would have been different. So when I first started,*  
25 *I would often tape the knee, or if they came back and said that it was painful, I asked them to*  
26 *kind of back off. Almost think about off-loading the knee if it was painful. So trying to reduce*  
27 *activity if it was sore. And then I think just as I became more experienced and read more about*  
28 *that type of thing, I got more confident in not using adjunct and trying to use loaded exercise*  
29 *and reassurance about pain. So I think it fits more with my current practice, and I don't think*  
30 *it was that different. Obviously, I do a lot of pain education with back patients, so I think that*  
31 *was quite easily transferable." [T8 – Loaded Self-Managed].*  
32  
33  
34

35 Department culture has been identified in previous qualitative work as a facilitator or barrier to  
36 change, over and above research evidence and clinical guidelines,<sup>[27,28]</sup> and the physiotherapists within  
37 this study also reflected upon department culture as a driver of practice.  
38  
39

40 *"I guess in this department we're quite used to doing that sort of intervention for these*  
41 *patients, so it wasn't particularly ground-breaking to me, in a nice way [laughter]. It's your*  
42 *[the researcher's] fault." [T2 – Loaded Self-Managed].*  
43  
44  
45

46 *"Oh, it is working in a different environment as well. So when I was in \*\* I was most of the time*  
47 *by myself in a GP clinic. And you don't get a lot of interaction. That influence, when you actually*  
48 *have a bigger [department]. We talk about loading as well. So we talk about Achilles or*  
49 *tendons and we just keep talking about how everything changes and you just do your own*  
50 *research and you think, "Okay." How to make it better." [T9 – Usual Physiotherapy].*  
51  
52  
53

54 Two physiotherapists discussed how being part of the research challenged their current practice and  
55 resulted in clinical development to both patients with and without PFP. One physiotherapist conferred  
56 how the training package and personal reflection of treating study patients challenged him; the second  
57 from sparking an interest in research.  
58  
59  
60

1  
2  
3 *"I think if you tell them, "Actually, how do you feel about it. You're in control," gives them the*  
4 *onus to take what they do. That's definitely changed massively. And I kind of do that with other*  
5 *patients now as well, not just the knee patients. I'm a little less strict on sets and reps. I'm more*  
6 *do what you feel you can. If you're happier, push on a little bit more."* [T3 – Loaded Self-  
7 *Managed].*  
8  
9

## 10 11 **Discussion**

### 12 13 **Main Findings**

14  
15 In respect to barriers and facilitators, the five major overlapping themes that emerged from the data  
16 were: (1) locus of control; (2) belief and attitude to pain; (3) treatment expectations and preference;  
17 (4) participants' engagement with the loaded self-managed exercises; and (5) physiotherapists' clinical  
18 development. Locus of control was one overarching theme that was evident throughout.  
19

20  
21 The aim of this qualitative study was to identify barriers and facilitators to the implementation of a  
22 loaded self-management exercise programme, which included education and advice on physical  
23 activity. Contrary to popular concerns relating to adherence of painful exercises,<sup>[7,8,29]</sup> all patients in  
24 the intervention group reported positive engagement. However, flare-ups from over dosing  
25 occasionally happened, with some patients expressing concern over reoccurring thoughts of 'tissue  
26 damage'; this may be relevant to all patients receiving an exercise programme. This topic needs  
27 additional emphasis in any future training programme delivered to the physiotherapists, for example  
28 with an addition of a dedicated objective in the training package, or via case-study workshops.  
29 Previous research has identified physiotherapists' negative beliefs around pain and exercise as a  
30 potential barrier to loaded exercises,<sup>[10]</sup> but this was not apparent with the physiotherapists from both  
31 groups interviewed in this study.  
32  
33

34  
35 A key aspect of the loaded self-managed exercise programme is the single exercise method. Previous  
36 research with a similar approach in patients with shoulder pain identified this as a potential barrier to  
37 implementation, with physiotherapists and patients viewing this with a degree of uncertainty and  
38 scepticism.<sup>[9,10]</sup> However, contrary to this research, and despite not aligning with the physiotherapists'  
39 usual practice, both physiotherapists and patients generally viewed the single exercise approach in a  
40 positive manner. Furthermore, there was a general underlying acknowledgement of the key benefits  
41 of a single exercise approach, from both patients and physiotherapists, in terms of a time-saving  
42 approach aimed at optimising adherence, and improved dosage monitoring.  
43  
44

45  
46 Locus of control is thought to predict health-related behaviours and physical activity,<sup>[30]</sup> with an  
47 important concept that it may predict healthcare utilisation.<sup>[31]</sup> Locus of control and the psychological  
48 construct of self-efficacy has overlapping meaning, where it relates to the power of thinking in  
49 achieving treatment outcomes.<sup>[18]</sup> The loaded self-managed exercise programme is designed around  
50 optimisation of self-management and self-efficacy. For example, the progressive hierarchy of  
51 exercises<sup>[19]</sup>; self-dosage of the exercise; mastery of a single exercise approach; and self-management  
52 strategies for physical activity engagement, providing the foundations for self-management of flare-  
53 ups, are intended to reduce the need for direct physiotherapy intervention. It has been shown that  
54 the lack of belief in one's own ability to manage and function despite pain is a significant predictor of  
55 which individuals with pain become disabled or depressed, with regression analysis showing that self-  
56  
57  
58  
59  
60

1  
2  
3 efficacy mediates the relationship between pain and disability.<sup>[32]</sup> Within the context of this study,  
4 patients in the intervention group described narratives that could be conceptualised as self-efficacious  
5 with greater internal locus of control, compared with patients in the usual physiotherapy group. This  
6 could be seen particularly in relation to return to physical activity; belief and attitude to pain;  
7 engagement of the intervention with self-dosage of the therapeutic exercise; and self-management.  
8  
9

## 10 **Clinical and research implications**

11 Previous qualitative work has suggested that department culture is a key driver or barrier to  
12 change.<sup>[27,28]</sup> Indeed, there were clear examples of department culture within this study directly  
13 driving recent changes in physiotherapists' clinical practice. This matched previous physiotherapy  
14 qualitative work that has identified reflexion of practice and implementation of change, perhaps  
15 expeditiously, in physiotherapists who are directly engaged in research.<sup>[10]</sup> With recent research  
16 demonstrating that research active hospitals have better patient outcomes,<sup>[33]</sup> this may be considered  
17 a good thing. However, the results of this qualitative study suggest that in departments which are  
18 actively engaged with research, clinical practice may be driven by members of the research team, in  
19 lieu of definitive research results or clinical guidelines. Considering the lead researcher works in the  
20 department where the interviews were conducted, and may in part drive department culture,  
21 implementation of the intervention in other departments may be more complicated.  
22  
23  
24  
25

26  
27 Implementation fidelity refers to the degree by which the delivery of an intervention adheres to the  
28 protocol and description.<sup>[33]</sup> Physiotherapists delivering usual physiotherapy differed from the UK's  
29 usual practice, and best practice guidelines, largely with regards to the advice given on tolerable levels  
30 of pain during exercise and physical activity, and how the number and repetitions of the exercises are  
31 prescribed.<sup>[6,7]</sup> Cluster randomisation, where intervention and control participants are located at  
32 different recruitment sites, is one way of overcoming what is referred to as "contamination".<sup>[34]</sup>  
33  
34

35 This research demonstrates that even though physiotherapists have certain expectations around  
36 management and exercise prescription, their approach was adaptable to the intervention with only  
37 two, two-hour training sessions; enabling patients to self-manage and make sensible decisions about  
38 their own treatment and return to physical activity. The results of this study establish a skillset needed  
39 to deliver the intervention, including: complex musculoskeletal assessment; anatomy; tissue healing  
40 and remodelling; pain biology; peripheral and central sensitisation; psychological and social factors  
41 that might affect pain perception; self-management strategies; and education skills. Currently, in the  
42 UK, these skills form part of the degree training programme for physiotherapy, further supplemented  
43 by the research training package.  
44  
45  
46  
47

## 48 **Study limitations and strengths**

49 Two authors independently coded all transcripts, and used a clear, transparent and reproducible  
50 methodological approach to data analysis. The author's clinical and research experience lie within the  
51 biopsychosocial framework of musculoskeletal pain. It is worth noting that the interviewer made it  
52 explicit to the participants that he was a physiotherapist working in the department conducting the  
53 research.  
54  
55

56 Despite efforts to the contrary, the main limitations of this study were the difficulty in interviewing  
57 patients lost to follow-up (from both treatment groups) and those classed as non-responders in the  
58  
59  
60

1  
2  
3 experimental intervention group. Four patients were contacted who failed to return any outcome  
4 measures, and initially agreed to be interviewed; unfortunately, they failed to attend.  
5

6  
7 The study population comprised of a single clinical setting, where the researcher was also a clinician  
8 and where clinical trials are often undertaken; it is unknown how transferable the intervention is  
9 without the relevant physiotherapy training package.  
10

11 It is possible that the patient sample may differ from other samples within the UK, and how  
12 representative these findings are to other populations with PFP is unknown.  
13  
14

## 15 16 **Conclusion**

17 This qualitative paper has identified some of the barriers and facilitators with participants  
18 (physiotherapists and patients) with the delivery of a loaded self-managed exercise programme, with  
19 education and advice on physical activity.  
20

21  
22 From the patients' perspective, facilitators to engagement included effective education around: self-  
23 management on exercise dosage; physical activity; and flare-ups. This facilitation may have been  
24 mediated, in some part, to enhancements of self-efficacy and internalised locus of control. From the  
25 physiotherapists' perspective, these results highlight the importance of 'control' and self-  
26 management during their assessment and management of patients with PFP.  
27  
28

29 In the context of the UK's usual management approach for PFP, which showed that a large proportion  
30 of practising physiotherapists would advise a patient to cease exercise or physical activity if they  
31 experience pain, implementation into general clinical practice may be challenging, but, ultimately  
32 feasible.  
33  
34  
35  
36  
37  
38

## 39 **Authors' contributions**

40 BES was responsible for conception and design, compiling the interview schedule, interviewing,  
41 transcribing, coding, analysis and interpretation, drafting and revising the manuscript. FM was  
42 responsible for conception and design, compiling the interview schedule, coding, analysis and  
43 interpretation, drafting and revising the manuscript. PH, MB, JS, MR, TS and PL were involved in  
44 conception and design, interpretation and reviewing revisions to the manuscript. All authors have read  
45 and approved of the final manuscript.  
46  
47  
48  
49

## 50 **Funding**

51 This report is independent research arising from a Clinical Doctoral Research Fellowship, Benjamin  
52 Smith, ICA-CDRF-2015-01-002 supported by the National Institute for Health Research (NIHR) and  
53 Health Education England (HEE). The views expressed in this publication are those of the author(s) and  
54 not necessarily those of the NHS, the NIHR, HEE or the Department of Health. Dr Toby Smith is  
55 supported by funding from the National Institute for Health Research (NIHR) Oxford Health Biomedical  
56 Research Centre.  
57  
58  
59  
60



## Acknowledgments

We acknowledge Katie Smith, University Hospitals of Derby and Burton NHS Foundation Trust, who kindly helped with data collection.

## Competing interests

The authors declare that they have no competing interests.

## Ethics approval

This study was approved by the West Midlands - Black Country Research Ethics Committee (16/WM/0414) and Sponsored by University Hospitals of Derby and Burton NHS Foundation Trust. IRAS reference 211417.

## Availability of data

Further quotations are available from Benjamin Smith at [benjamin.smith3@nhs.net](mailto:benjamin.smith3@nhs.net). No additional data available.

## References

- 1 Smith BE, Selfe J, Thacker D, *et al.* Incidence and prevalence of patellofemoral pain: A systematic review and meta-analysis. *PLoS One* 2018;13(1). doi:10.1371/journal.pone.0190892
- 2 Smith BE, Moffatt F, Hendrick P, *et al.* The experience of living with patellofemoral pain—loss, confusion and fear-avoidance: a UK qualitative study. *BMJ Open* 2018;8:e018624. doi:10.1136/bmjopen-2017-018624
- 3 Maclachlan LR, Collins NJ, Matthews MLG, *et al.* The psychological features of patellofemoral pain: a systematic review. *Br J Sports Med* 2017;51:732–42. doi:10.1136/bjsports-2016-096705
- 4 Maclachlan LR, Matthews M, Hodges PW, *et al.* The psychological features of patellofemoral pain: a cross-sectional study. *Scand J Pain* 2018.
- 5 Smith BE, Hendrick P, Bateman M, *et al.* Study protocol: a mixed methods feasibility study for a loaded self-managed exercise programme for patellofemoral pain. *Pilot Feasibility Stud* 2017;4. doi:10.1186/s40814-017-0167-2
- 6 Barton CJ, Lack S, Hemmings S, *et al.* The ‘Best Practice Guide to Conservative Management of Patellofemoral Pain’: incorporating level 1 evidence with expert clinical reasoning. *Br J Sports Med* 2015;49:923–34. doi:10.1136/bjsports-2014-093637
- 7 Smith BE, Hendrick P, Bateman M, *et al.* Current Management Strategies for Patellofemoral Pain: An online survey of 99 practising UK physiotherapists. *BMC Musculoskelet Disord* 2017;18. doi:10.1186/s12891-017-1539-8
- 8 Jack K, McLean SM, Moffett JK, *et al.* Barriers to treatment adherence in physiotherapy outpatient clinics: A systematic review. *Man. Ther.* 2010;15:220–8.
- 9 Littlewood C, Malliaras P, Mawson S, *et al.* Patients with rotator cuff tendinopathy can successfully self-manage, but with certain caveats: a qualitative study. *Physiotherapy* 2014;100:80–5.
- 10 Littlewood C, Mawson S, May S, *et al.* Understanding the barriers and enablers to implementation of a self-managed exercise intervention: a qualitative study. *Physiotherapy* 2015;101:279–85.
- 11 Pope C, Ziebland S, Mays N. Analysing Qualitative Data. *Qual Res Heal Care* Published Online First: 2000. doi:10.1136/bmj.320.7227.114
- 12 Tong A, Sainsbury P, Craig J. Consolidated criteria for reporting qualitative research (COREQ): a 32-item checklist for interviews and focus groups. *Int J Qual Heal care* 2007;19:349–57.
- 13 Braun V, Clarke V. Using thematic analysis in psychology. *Qual Res Psychol* 2006;3:77–101.
- 14 Crossley KM, Stefanik JJ, Selfe J, *et al.* 2016 Patellofemoral pain consensus statement from the 4th International Patellofemoral Pain Research Retreat, Manchester. Part 1: Terminology, definitions, clinical examination, natural history, patellofemoral osteoarthritis and patient-reported outcome m. *Br J Sports Med* 2016;50:839–43.
- 15 Jones S, Hanchard N, Hamilton S, *et al.* A qualitative study of patients’ perceptions and priorities when living with primary frozen shoulder. *BMJ Open* 2013;3:e003452.
- 16 Gale NK, Heath G, Cameron E, *et al.* Using the framework method for the analysis of qualitative data in multi-disciplinary health research. *BMC Med Res Methodol* 2013;13:117.

- 1  
2  
3 17 Zimbardo PG. Psychology and life. *Glenview, IL: Scott, Foresman* 1985.  
4  
5 18 Myers AM, Powell LE, Maki BE, *et al.* Psychological indicators of balance confidence:  
6 relationship to actual and perceived abilities. *Journals Gerontol Ser A Biol Sci Med Sci*  
7 1996;51:M37–43.  
8  
9 19 Petruzzello SJ, Landers DM, Hatfield BD, *et al.* A meta-analysis on the anxiety-reducing effects  
10 of acute and chronic exercise. *Sport Med* 1991;11:143–82.  
11  
12 20 Schers H, Wensing M, Huijsmans Z, *et al.* Implementation barriers for general practice  
13 guidelines on low back pain: a qualitative study. *Spine (Phila Pa 1976)* 2001;26:E348–53.  
14  
15 21 Bernhardsson S, Larsson MEH, Johansson K, *et al.* “In the physio we trust”: A qualitative study  
16 on patients’ preferences for physiotherapy. *Physiother Theory Pract* 2017;33:535–49.  
17  
18 22 Houben RMA, Ostelo RWJG, Vlaeyen JWS, *et al.* Health care providers’ orientations towards  
19 common low back pain predict perceived harmfulness of physical activities and  
20 recommendations regarding return to normal activity. *Eur J Pain* 2005;9:173–83.  
21 doi:10.1016/j.ejpain.2004.05.002  
22  
23 23 Holden MA, Nicholls EE, Young J, *et al.* UK-based physical therapists’ attitudes and beliefs  
24 regarding exercise and knee osteoarthritis: findings from a mixed-methods study. *Arthritis*  
25 *Rheum* 2009;61:1511–21. doi:10.1002/art.24829  
26  
27 24 Darlow B, Fullen BM, Dean S, *et al.* The association between health care professional attitudes  
28 and beliefs and the attitudes and beliefs, clinical management, and outcomes of patients with  
29 low back pain: a systematic review. *Eur J Pain* 2012;16:3–17. doi:10.1016/j.ejpain.2011.06.006  
30  
31 25 Nijs J, Roussel N, Paul van Wilgen C, *et al.* Thinking beyond muscles and joints: Therapists’ and  
32 patients’ attitudes and beliefs regarding chronic musculoskeletal pain are key to applying  
33 effective treatment. *Man Ther* 2013;18:96–102.  
34  
35 26 Metcalfe C, Lewin R, Wisher S, *et al.* Barriers to implementing the evidence base in four NHS  
36 therapies: dietitians, occupational therapists, physiotherapists, speech and language  
37 therapists. *Physiotherapy* 2001;87:433–41.  
38  
39 27 Gabbay J, le May A. Evidence based guidelines or collectively constructed “mindlines?”  
40 Ethnographic study of knowledge management in primary care. *Bmj* 2004;329:1013.  
41  
42 28 Lowe A, Littlewood C, McLean S. Understanding physical activity promotion in physiotherapy  
43 practice: A qualitative study. *Musculosket Sci Pract* 2018.  
44  
45 29 McLean SM, Burton M, Bradley L, *et al.* Interventions for enhancing adherence with  
46 physiotherapy: A systematic review. *Man Ther* 2010;15:514–21.  
47 doi:10.1016/j.math.2010.05.012  
48  
49 30 Grisolia JM, Longo A, Hutchinson G, *et al.* Applying Health Locus of Control and Latent Class  
50 Modelling to food and physical activity choices affecting CVD risk. *Soc Sci Med* 2015;132:1–10.  
51  
52 31 Mautner D, Peterson B, Cunningham A, *et al.* How Multidimensional Health Locus of Control  
53 predicts utilization of emergency and inpatient hospital services. *J Health Psychol* 2017;22:314–  
54 23.  
55  
56 32 Arnstein P, Caudill M, Mandle CL, *et al.* Self efficacy as a mediator of the relationship between  
57 pain intensity, disability and depression in chronic pain patients. *Pain* 1999;80:483–91.  
58  
59  
60

- 1  
2  
3 33 Ozdemir BA, Karthikesalingam A, Sinha S, *et al.* Research activity and the association with  
4 mortality. *PLoS One* 2015;10:e0118253.  
5  
6 34 Torgerson DJ. Contamination in trials: is cluster randomisation the answer? *Bmj* 2001;322:355–  
7 7.  
8  
9  
10  
11  
12  
13  
14  
15  
16  
17  
18  
19  
20  
21  
22  
23  
24  
25  
26  
27  
28  
29  
30  
31  
32  
33  
34  
35  
36  
37  
38  
39  
40  
41  
42  
43  
44  
45  
46  
47  
48  
49  
50  
51  
52  
53  
54  
55  
56  
57  
58  
59  
60

For peer review only

## Consolidated criteria for reporting qualitative studies (COREQ): 32-item checklist

Developed from:

Tong A, Sainsbury P, Craig J. Consolidated criteria for reporting qualitative research (COREQ): a 32-item checklist for interviews and focus groups. *International Journal for Quality in Health Care*. 2007. Volume 19, Number 6: pp. 349 – 357

**YOU MUST PROVIDE A RESPONSE FOR ALL ITEMS. ENTER N/A IF NOT APPLICABLE**

| No. Item                                       | Guide questions/description                                                                                                                              | Reported on Page # |
|------------------------------------------------|----------------------------------------------------------------------------------------------------------------------------------------------------------|--------------------|
| <b>Domain 1: Research team and reflexivity</b> |                                                                                                                                                          |                    |
| <i>Personal Characteristics</i>                |                                                                                                                                                          |                    |
| 1. Interviewer/facilitator                     | Which author/s conducted the interview or focus group?                                                                                                   | Page 5             |
| 2. Credentials                                 | What were the researcher's credentials?<br>E.g. PhD, MD                                                                                                  | Page 5             |
| 3. Occupation                                  | What was their occupation at the time of the study?                                                                                                      | Page 5             |
| 4. Gender                                      | Was the researcher male or female?                                                                                                                       | Page 5             |
| 5. Experience and training                     | What experience or training did the researcher have?                                                                                                     | Page 5             |
| <i>Relationship with participants</i>          |                                                                                                                                                          |                    |
| 6. Relationship established                    | Was a relationship established prior to study commencement?                                                                                              | Page 5             |
| 7. Participant knowledge of the interviewer    | What did the participants know about the researcher? e.g. personal goals, reasons for doing the research                                                 | Page 5             |
| 8. Interviewer characteristics                 | What characteristics were reported about the interviewer/facilitator? e.g. Bias, assumptions, reasons and interests in the research topic                | Page 5 & 17        |
| <b>Domain 2: study design</b>                  |                                                                                                                                                          |                    |
| <i>Theoretical framework</i>                   |                                                                                                                                                          |                    |
| 9. Methodological orientation and Theory       | What methodological orientation was stated to underpin the study? e.g. grounded theory, discourse analysis, ethnography, phenomenology, content analysis | Page 5             |
| <i>Participant selection</i>                   |                                                                                                                                                          |                    |
| 10. Sampling                                   | How were participants selected? e.g. purposive, convenience, consecutive, snowball                                                                       | Page 5             |
| 11. Method of approach                         | How were participants approached? e.g. face-to-face, telephone, mail, email                                                                              | Page 5             |
| 12. Sample size                                | How many participants were in the study?                                                                                                                 | Page 5             |

|                                        |                                                                                                                                 |            |
|----------------------------------------|---------------------------------------------------------------------------------------------------------------------------------|------------|
| 13. Non-participation                  | How many people refused to participate or dropped out? Reasons?                                                                 | Page 17    |
| <i>Setting</i>                         |                                                                                                                                 |            |
| 14. Setting of data collection         | Where was the data collected? e.g. home, clinic, workplace                                                                      | Page 5     |
| 15. Presence of non-participants       | Was anyone else present besides the participants and researchers?                                                               | Page 5     |
| 16. Description of sample              | What are the important characteristics of the sample? e.g. demographic data, date                                               | Page 7 & 8 |
| <i>Data collection</i>                 |                                                                                                                                 |            |
| 17. Interview guide                    | Were questions, prompts, guides provided by the authors? Was it pilot tested?                                                   | Page 6     |
| 18. Repeat interviews                  | Were repeat inter views carried out? If yes, how many?                                                                          | N/A        |
| 19. Audio/visual recording             | Did the research use audio or visual recording to collect the data?                                                             | Page 6     |
| 20. Field notes                        | Were field notes made during and/or after the inter view or focus group?                                                        | Page 6     |
| 21. Duration                           | What was the duration of the inter views or focus group?                                                                        | Page 7     |
| 22. Data saturation                    | Was data saturation discussed?                                                                                                  | Page 5     |
| 23. Transcripts returned               | Were transcripts returned to participants for comment and/or correction?                                                        | No         |
| <b>Domain 3: analysis and findings</b> |                                                                                                                                 |            |
| <i>Data analysis</i>                   |                                                                                                                                 |            |
| 24. Number of data coders              | How many data coders coded the data?                                                                                            | Page 6     |
| 25. Description of the coding tree     | Did authors provide a description of the coding tree?                                                                           | N/A        |
| 26. Derivation of themes               | Were themes identified in advance or derived from the data?                                                                     | Page 6     |
| 27. Software                           | What software, if applicable, was used to manage the data?                                                                      | NVivo      |
| 28. Participant checking               | Did participants provide feedback on the findings?                                                                              | No         |
| <i>Reporting</i>                       |                                                                                                                                 |            |
| 29. Quotations presented               | Were participant quotations presented to illustrate the themes/findings? Was each quotation identified? e.g. participant number | Results    |
| 30. Data and findings consistent       | Was there consistency between the data presented and the findings?                                                              | Discussion |
| 31. Clarity of major themes            | Were major themes clearly presented in the findings?                                                                            | RESULTS    |
| 32. Clarity of minor themes            | Is there a description of diverse cases or discussion of minor themes?                                                          | Discussion |

**Once you have completed this checklist, please save a copy and upload it as part of your submission. When requested to do so as part of the upload process, please select the file type: *Checklist*. You will NOT be able to proceed with**

1  
2  
3  
4  
5  
6  
7  
8  
9  
10  
11  
12  
13  
14  
15  
16  
17  
18  
19  
20  
21  
22  
23  
24  
25  
26  
27  
28  
29  
30  
31  
32  
33  
34  
35  
36  
37  
38  
39  
40  
41  
42  
43  
44  
45  
46  
47  
48  
49  
50  
51  
52  
53  
54  
55  
56  
57  
58  
59  
60

**submission unless the checklist has been uploaded. Please DO NOT include this checklist as part of the main manuscript document. It must be uploaded as a separate file.**

For peer review only
